# Supplementary material for: Arc eruptions deliver ‘first blow’ in the pulsed end-Permian mass extinction
Source: Research Square preprint supplement (doi:10.21203/rs.3.rs-105487/v1), 2021-11-12
Supplement: Supplementary file 1 [file 7a44e62af46d96c7beb56bb1.xls]

## Sheet: PlotDat1
Source sheet	U-Pb Data Table	0.282774	0.0400586	0.282589	0.03998	0.282956	0.0400269	0.283762	0.0400845	0.283559	0.0400813	0.284663	0.0400649	0.284757	0.0400649	0.283728	0.0400585	0.284538	0.0400535
Plot name	Concordia1	0.283045	0.0400529	0.282589	0.03998	0.283083	0.0400431	0.283752	0.0400876	0.283554	0.0400829	0.284658	0.0400674	0.284752	0.0400675	0.283724	0.0400609	0.284533	0.0400559
Plot Type	1	0.283543	0.0400395	0.282624	0.0399845	0.283209	0.0400592	0.283724	0.0400901	0.283539	0.0400839	0.284644	0.0400697	0.284734	0.0400699	0.28371	0.0400631	0.28452	0.0400581
1st free col	21	0.283403	0.0400387	0.282659	0.039989	0.283335	0.0400754	0.283676	0.0400919	0.283514	0.0400843	0.28462	0.0400717	0.284706	0.040072	0.283686	0.040065	0.284497	0.04006
Sigma Level	2	0.282625	0.0400336	0.282694	0.0399934	0.283462	0.0400915	0.283612	0.0400932	0.28348	0.0400841	0.284587	0.0400735	0.284666	0.0400739	0.283654	0.0400667	0.284466	0.0400616
Absolute Errs	FALSE	0.28348	0.0400294	0.282729	0.0399979	0.283588	0.0401076	0.283531	0.0400937	0.283438	0.0400832	0.284545	0.0400749	0.284615	0.0400754	0.283612	0.0400681	0.284427	0.040063
Symbol Type	1	IsoLine	IsoLine	0.282764	0.0400024	IsoLine	IsoLine	0.283435	0.0400936	0.283388	0.0400818	0.284495	0.0400761	0.284554	0.0400766	0.283563	0.0400692	0.284379	0.040064
Inverse Plot	FALSE			0.282799	0.0400069			0.283326	0.0400928	0.283332	0.0400799	0.284437	0.040077	0.284483	0.0400775	0.283505	0.0400699	0.284324	0.0400648
Color Plot	FALSE			0.282834	0.0400114			0.283207	0.0400913	0.28327	0.0400774	0.28437	0.0400775	0.284403	0.0400781	0.28344	0.0400704	0.284261	0.0400653
3D plot	FALSE			0.282869	0.0400159			0.283079	0.0400892	0.283203	0.0400744	0.284297	0.0400777	0.284315	0.0400783	0.283368	0.0400706	0.284192	0.0400655
Linear	FALSE			0.282905	0.0400203			0.282945	0.0400865	0.283134	0.040071	0.284218	0.0400776	0.284219	0.0400782	0.283289	0.0400704	0.284117	0.0400653
Data Range	N8:R13			0.28294	0.0400248			0.282808	0.0400832	0.283062	0.0400673	0.284132	0.0400771	0.284115	0.0400777	0.283205	0.0400699	0.284036	0.0400649
Filled Symbols	FALSE			0.282975	0.0400293			0.282671	0.0400795	0.282991	0.0400632	0.284042	0.0400764	0.284006	0.0400769	0.283116	0.0400691	0.283951	0.0400641
ConcAge	FALSE			0.28301	0.0400338			0.282535	0.0400754	0.28292	0.040059	0.283947	0.0400753	0.283892	0.0400758	0.283023	0.040068	0.283862	0.0400631
ConcSwap	FALSE			0.283045	0.0400383			0.282404	0.0400709	0.282852	0.0400547	0.283849	0.0400739	0.283773	0.0400744	0.282926	0.0400667	0.283769	0.0400618
1st Symbol-row	1			0.28308	0.0400428			0.28228	0.0400662	0.282788	0.0400503	0.283748	0.0400722	0.283651	0.0400727	0.282827	0.040065	0.283674	0.0400602
				0.283115	0.0400472			0.282166	0.0400613	0.282728	0.040046	0.283646	0.0400703	0.283527	0.0400706	0.282726	0.0400631	0.283577	0.0400583
				0.28315	0.0400517			0.282064	0.0400564	0.282675	0.0400418	0.283542	0.0400681	0.283402	0.0400683	0.282624	0.0400609	0.283479	0.0400562
				0.283185	0.0400562			0.281975	0.0400516	0.282629	0.0400378	0.283439	0.0400656	0.283277	0.0400658	0.282522	0.0400585	0.283382	0.0400538
				0.283221	0.0400607			0.281902	0.0400468	0.282591	0.0400341	0.283336	0.0400629	0.283153	0.040063	0.282421	0.0400558	0.283285	0.0400513
				0.283256	0.0400652			0.281846	0.0400423	0.282562	0.0400308	0.283236	0.04006	0.283031	0.04006	0.282322	0.040053	0.28319	0.0400485
				0.283291	0.0400697			0.281808	0.0400381	0.282543	0.0400279	0.283138	0.040057	0.282913	0.0400569	0.282225	0.04005	0.283097	0.0400456
				0.283326	0.0400741			0.281789	0.0400343	0.282533	0.0400255	0.283043	0.0400538	0.282798	0.0400535	0.282132	0.0400469	0.283008	0.0400426
				0.283361	0.0400786			0.281789	0.040031	0.282533	0.0400236	0.282953	0.0400504	0.282689	0.0400501	0.282043	0.0400437	0.282923	0.0400394
				0.283396	0.0400831			0.281809	0.0400282	0.282543	0.0400223	0.282867	0.040047	0.282586	0.0400465	0.281959	0.0400403	0.282842	0.0400362
				0.283431	0.0400876			0.281847	0.040026	0.282563	0.0400216	0.282788	0.0400435	0.28249	0.0400429	0.281881	0.040037	0.282767	0.0400329
				0.283466	0.0400921			0.281903	0.0400245	0.282592	0.0400215	0.282715	0.04004	0.282401	0.0400393	0.281808	0.0400336	0.282698	0.0400295
				0.283502	0.0400966			0.281976	0.0400236	0.28263	0.040022	0.282649	0.0400365	0.282321	0.0400356	0.281743	0.0400302	0.282636	0.0400262
				0.283537	0.040101			0.282064	0.0400234	0.282676	0.0400232	0.28259	0.040033	0.282251	0.040032	0.281686	0.0400268	0.28258	0.0400229
				0.283572	0.0401055			0.282167	0.0400238	0.282729	0.0400249	0.28254	0.0400295	0.28219	0.0400284	0.281636	0.0400235	0.282533	0.0400197
				0.283607	0.04011			0.282281	0.040025	0.282789	0.0400271	0.282498	0.0400262	0.282139	0.0400249	0.281595	0.0400202	0.282494	0.0400165
				0.283607	0.04011			0.282405	0.0400268	0.282853	0.0400298	0.282465	0.0400229	0.2821	0.0400215	0.281563	0.0400171	0.282463	0.0400134
				IsoLine	IsoLine			0.282536	0.0400292	0.282922	0.040033	0.282442	0.0400198	0.282071	0.0400183	0.281539	0.0400141	0.28244	0.0400105
								0.282672	0.0400322	0.282992	0.0400366	0.282427	0.0400169	0.282054	0.0400153	0.281525	0.0400113	0.282427	0.0400078
								0.28281	0.0400357	0.283064	0.0400405	0.282423	0.0400141	0.282048	0.0400124	0.281521	0.0400087	0.282422	0.0400052
								0.282947	0.0400396	0.283135	0.0400446	0.282428	0.0400116	0.282054	0.0400098	0.281526	0.0400063	0.282427	0.0400028
								0.28308	0.040044	0.283205	0.0400489	0.282442	0.0400093	0.282071	0.0400074	0.28154	0.0400041	0.28244	0.0400007
								0.283208	0.0400486	0.283271	0.0400533	0.282466	0.0400073	0.2821	0.0400053	0.281563	0.0400022	0.282463	0.0399988
								0.283327	0.0400534	0.283333	0.0400576	0.282499	0.0400055	0.28214	0.0400035	0.281596	0.0400005	0.282494	0.0399971
								0.283436	0.0400582	0.283389	0.0400619	0.28254	0.0400041	0.28219	0.0400019	0.281637	0.0399992	0.282534	0.0399958
								0.283531	0.0400632	0.283439	0.040066	0.282591	0.0400029	0.282251	0.0400007	0.281686	0.0399981	0.282581	0.0399947
								0.283612	0.040068	0.283481	0.0400699	0.282649	0.040002	0.282322	0.0399998	0.281744	0.0399973	0.282636	0.0399939
								0.283677	0.0400726	0.283515	0.0400734	0.282716	0.0400015	0.282402	0.0399993	0.281809	0.0399968	0.282699	0.0399934
								0.283724	0.040077	0.283539	0.0400765	0.282789	0.0400013	0.282491	0.039999	0.281881	0.0399967	0.282768	0.0399933
								0.283752	0.040081	0.283554	0.0400791	0.282868	0.0400014	0.282587	0.0399992	0.28196	0.0399968	0.282843	0.0399934
								0.283762	0.0400845	0.283559	0.0400813	0.282954	0.0400019	0.28269	0.0399996	0.282044	0.0399973	0.282924	0.0399938
								Black	Black	Black	Black	0.283044	0.0400026	0.282799	0.0400004	0.282133	0.0399981	0.283009	0.0399946
												0.283139	0.0400037	0.282914	0.0400015	0.282226	0.0399992	0.283099	0.0399956
												0.283237	0.0400051	0.283033	0.0400029	0.282323	0.0400006	0.283191	0.039997
												0.283338	0.0400068	0.283154	0.0400047	0.282422	0.0400022	0.283286	0.0399986
												0.28344	0.0400087	0.283278	0.0400067	0.282523	0.0400042	0.283383	0.0400004
												0.283544	0.0400109	0.283403	0.040009	0.282625	0.0400064	0.283481	0.0400026
												0.283647	0.0400134	0.283528	0.0400115	0.282727	0.0400088	0.283578	0.0400049
												0.283749	0.0400161	0.283652	0.0400143	0.282828	0.0400114	0.283675	0.0400075
												0.28385	0.040019	0.283774	0.0400173	0.282927	0.0400142	0.28377	0.0400102
												0.283948	0.040022	0.283893	0.0400205	0.283024	0.0400172	0.283863	0.0400131
												0.284043	0.0400252	0.284007	0.0400238	0.283117	0.0400203	0.283952	0.0400162
												0.284133	0.0400286	0.284116	0.0400272	0.283206	0.0400236	0.284037	0.0400193
												0.284219	0.040032	0.28422	0.0400308	0.28329	0.0400269	0.284118	0.0400225
												0.284298	0.0400355	0.284316	0.0400344	0.283369	0.0400303	0.284193	0.0400258
												0.284371	0.040039	0.284404	0.0400381	0.283441	0.0400337	0.284262	0.0400292
												0.284437	0.0400425	0.284484	0.0400417	0.283506	0.0400371	0.284324	0.0400325
												0.284496	0.040046	0.284555	0.0400454	0.283563	0.0400405	0.28438	0.0400358
												0.284546	0.0400495	0.284616	0.0400489	0.283613	0.0400438	0.284427	0.0400391
												0.284588	0.0400528	0.284666	0.0400524	0.283654	0.040047	0.284467	0.0400422
												0.284621	0.0400561	0.284706	0.0400558	0.283686	0.0400501	0.284498	0.0400453
												0.284644	0.0400592	0.284734	0.040059	0.28371	0.0400531	0.28452	0.0400482
												0.284658	0.0400621	0.284752	0.0400621	0.283724	0.0400559	0.284533	0.040051
												0.284663	0.0400649	0.284757	0.0400649	0.283728	0.0400585	0.284538	0.0400535
												Black	Black	Black	Black	Black	Black	Black	Black

## Sheet: PlotDat2
Source sheet	U-Pb Data Table	0.283007	0.0401292	0.282276	0.03994	0.281693	0.0398656	0.284855	0.0401573	0.284179	0.0401346	0.284166	0.0401179	0.284263	0.0401152	0.287503	0.0401087
Plot name	Concordia2	0.282834	0.0401099	0.282276	0.03994	0.281946	0.0398979	0.284837	0.0401615	0.284166	0.0401385	0.284154	0.040122	0.284249	0.040119	0.287486	0.0401151
Plot Type	1	0.283299	0.0400924	0.282346	0.039949	0.282198	0.0399302	0.284783	0.0401651	0.284127	0.0401418	0.284118	0.0401254	0.284207	0.0401221	0.287438	0.0401211
1st free col	19	0.283224	0.0400904	0.282416	0.0399579	0.282451	0.0399624	0.284695	0.040168	0.284063	0.0401445	0.284061	0.0401278	0.284138	0.0401242	0.287358	0.0401265
Sigma Level	2	0.28372	0.0400618	0.282486	0.0399669	0.282704	0.0399947	0.284574	0.0401701	0.283975	0.0401465	0.283983	0.0401292	0.284044	0.0401255	0.287247	0.0401314
Absolute Errs	FALSE	IsoLine	IsoLine	0.282556	0.0399759	0.282956	0.0400269	0.284422	0.0401715	0.283864	0.0401478	0.283886	0.0401297	0.283927	0.0401258	0.287106	0.0401357
Symbol Type	1			0.282626	0.0399848	0.283209	0.0400592	0.284243	0.040172	0.283734	0.0401484	0.283773	0.0401291	0.283792	0.0401251	0.286936	0.0401394
Inverse Plot	FALSE			0.282697	0.0399938	0.283462	0.0400915	0.28404	0.0401716	0.283586	0.0401482	0.283647	0.0401276	0.283641	0.0401235	0.286738	0.0401424
Color Plot	FALSE			0.282767	0.0400028	0.283715	0.0401238	0.283817	0.0401705	0.283423	0.0401473	0.283511	0.040125	0.283478	0.0401209	0.286515	0.0401447
3D plot	FALSE			0.282837	0.0400117	0.283968	0.040156	0.283578	0.0401685	0.283249	0.0401456	0.28337	0.0401216	0.283309	0.0401176	0.286268	0.0401464
Linear	FALSE			0.282907	0.0400207	0.28422	0.0401883	0.283327	0.0401658	0.283067	0.0401433	0.283227	0.0401174	0.283137	0.0401135	0.285999	0.0401473
Data Range	N16:R20			0.282977	0.0400296	IsoLine	IsoLine	0.283071	0.0401624	0.282881	0.0401403	0.283086	0.0401125	0.282968	0.0401087	0.28571	0.0401474
Filled Symbols	FALSE			0.283048	0.0400386			0.282813	0.0401583	0.282693	0.0401367	0.282951	0.0401071	0.282805	0.0401035	0.285405	0.0401469
ConcAge	FALSE			0.283118	0.0400476			0.282559	0.0401536	0.282508	0.0401326	0.282825	0.0401012	0.282654	0.0400979	0.285086	0.0401456
ConcSwap	FALSE			0.283188	0.0400565			0.282314	0.0401485	0.28233	0.040128	0.282712	0.0400951	0.282519	0.0400921	0.284754	0.0401436
1st Symbol-row	1			0.283258	0.0400655			0.282082	0.040143	0.282161	0.0401231	0.282615	0.040089	0.282403	0.0400863	0.284414	0.0401409
				0.283329	0.0400745			0.281868	0.0401372	0.282006	0.040118	0.282537	0.0400829	0.282309	0.0400805	0.284068	0.0401375
				0.283399	0.0400834			0.281677	0.0401313	0.281867	0.0401127	0.28248	0.0400771	0.28224	0.0400751	0.283719	0.0401335
				0.283469	0.0400924			0.281511	0.0401253	0.281746	0.0401073	0.282445	0.0400717	0.282198	0.04007	0.28337	0.0401289
				0.283539	0.0401014			0.281375	0.0401194	0.281647	0.040102	0.282433	0.0400669	0.282184	0.0400655	0.283024	0.0401237
				0.28361	0.0401103			0.28127	0.0401137	0.28157	0.0400968	0.282445	0.0400627	0.282198	0.0400617	0.282684	0.040118
				0.28368	0.0401193			0.281199	0.0401083	0.281519	0.0400919	0.28248	0.0400594	0.28224	0.0400587	0.282353	0.0401118
				0.28375	0.0401283			0.281163	0.0401033	0.281493	0.0400873	0.282538	0.040057	0.282309	0.0400565	0.282033	0.0401051
				0.28382	0.0401372			0.281163	0.0400988	0.281493	0.0400832	0.282616	0.0400555	0.282404	0.0400553	0.281728	0.0400981
				0.283891	0.0401462			0.281199	0.0400949	0.281519	0.0400796	0.282713	0.0400551	0.28252	0.040055	0.28144	0.0400908
				0.283961	0.0401552			0.28127	0.0400917	0.281571	0.0400766	0.282826	0.0400556	0.282655	0.0400557	0.281171	0.0400833
				0.284031	0.0401641			0.281375	0.0400891	0.281647	0.0400743	0.282952	0.0400572	0.282807	0.0400573	0.280924	0.0400755
				0.284101	0.0401731			0.281512	0.0400874	0.281747	0.0400726	0.283088	0.0400597	0.282969	0.0400598	0.280701	0.0400677
				0.284172	0.0401821			0.281678	0.0400865	0.281867	0.0400717	0.283229	0.0400631	0.283138	0.0400632	0.280503	0.0400598
				0.284242	0.040191			0.281869	0.0400864	0.282007	0.0400715	0.283372	0.0400674	0.28331	0.0400673	0.280333	0.0400519
				0.284312	0.0402			0.282083	0.0400871	0.282162	0.040072	0.283513	0.0400722	0.28348	0.040072	0.280192	0.0400441
				0.284312	0.0402			0.282315	0.0400887	0.282331	0.0400733	0.283648	0.0400777	0.283642	0.0400773	0.280081	0.0400364
				IsoLine	IsoLine			0.28256	0.040091	0.28251	0.0400753	0.283774	0.0400835	0.283793	0.0400828	0.280002	0.040029
								0.282814	0.0400941	0.282694	0.040078	0.283887	0.0400896	0.283928	0.0400886	0.279953	0.0400218
								0.283072	0.0400979	0.282882	0.0400813	0.283983	0.0400958	0.284045	0.0400945	0.279937	0.040015
								0.283328	0.0401023	0.283068	0.0400851	0.284062	0.0401019	0.284138	0.0401002	0.279953	0.0400086
								0.283578	0.0401072	0.283251	0.0400895	0.284119	0.0401077	0.284207	0.0401057	0.280002	0.0400026
								0.283818	0.0401125	0.283424	0.0400942	0.284154	0.0401131	0.284249	0.0401107	0.280082	0.0399972
								0.284041	0.0401182	0.283587	0.0400993	0.284166	0.0401179	0.284263	0.0401152	0.280193	0.0399923
								0.284244	0.040124	0.283735	0.0401045	Black	Black	Black	Black	0.280334	0.039988
								0.284423	0.04013	0.283865	0.0401099					0.280504	0.0399843
								0.284575	0.0401359	0.283975	0.0401152					0.280702	0.0399813
								0.284696	0.0401418	0.284063	0.0401205					0.280925	0.0399789
								0.284784	0.0401473	0.284127	0.0401255					0.281172	0.0399773
								0.284837	0.0401526	0.284166	0.0401302					0.281441	0.0399764
								0.284855	0.0401573	0.284179	0.0401346					0.281729	0.0399762
								Black	Black	Black	Black					0.282035	0.0399768
																0.282354	0.0399781
																0.282686	0.0399801
																0.283026	0.0399828
																0.283372	0.0399862
																0.283721	0.0399902
																0.28407	0.0399948
																0.284416	0.04
																0.284756	0.0400057
																0.285087	0.0400119
																0.285407	0.0400186
																0.285712	0.0400256
																0.286	0.0400329
																0.286269	0.0400404
																0.286516	0.0400482
																0.286739	0.040056
																0.286936	0.0400639
																0.287106	0.0400718
																0.287247	0.0400796
																0.287358	0.0400873
																0.287438	0.0400947
																0.287486	0.0401019
																0.287503	0.0401087
																Black	Black

## Sheet: PlotDat3
Source sheet	U-Pb Data Table	0.283417	0.0401562	0.283059	0.04004	0.282956	0.0400269	0.284276	0.040183	0.284568	0.0401627	0.284304	0.0401541	0.284222	0.0401557	0.284051	0.0401548	0.28449	0.04012
Plot name	Concordia3	0.283844	0.0401368	0.283059	0.04004	0.283083	0.0400431	0.284268	0.0401858	0.284561	0.0401655	0.284296	0.0401571	0.284214	0.0401581	0.284044	0.0401567	0.284483	0.0401226
Plot Type	1	0.283443	0.0401292	0.283107	0.0400462	0.283209	0.0400592	0.284243	0.0401881	0.28454	0.0401676	0.284271	0.0401595	0.28419	0.0401597	0.284024	0.0401577	0.284461	0.0401247
1st free col	21	0.283635	0.0401281	0.283156	0.0400524	0.283335	0.0400754	0.284202	0.0401897	0.284505	0.0401692	0.28423	0.0401614	0.284151	0.0401605	0.28399	0.0401577	0.284426	0.0401262
Sigma Level	2	0.28355	0.0401243	0.283204	0.0400586	0.283462	0.0400915	0.284145	0.0401907	0.284458	0.0401701	0.284173	0.0401626	0.284098	0.0401604	0.283945	0.0401569	0.284377	0.040127
Absolute Errs	FALSE	0.283749	0.0400938	0.283253	0.0400648	0.283588	0.0401076	0.284075	0.040191	0.284398	0.0401704	0.284102	0.0401632	0.284032	0.0401594	0.283889	0.0401552	0.284316	0.0401272
Symbol Type	1	IsoLine	IsoLine	0.283302	0.040071	0.283715	0.0401238	0.283991	0.0401906	0.284328	0.04017	0.284019	0.0401631	0.283956	0.0401575	0.283823	0.0401526	0.284244	0.0401268
Inverse Plot	FALSE			0.28335	0.0400772	0.283841	0.0401399	0.283897	0.0401896	0.284248	0.040169	0.283924	0.0401624	0.28387	0.0401548	0.28375	0.0401493	0.284163	0.0401257
Color Plot	FALSE			0.283399	0.0400834	0.283968	0.040156	0.283793	0.0401879	0.284161	0.0401673	0.28382	0.040161	0.283779	0.0401515	0.283672	0.0401453	0.284073	0.040124
3D plot	FALSE			0.283447	0.0400897	0.284094	0.0401722	0.283682	0.0401856	0.284067	0.0401651	0.283709	0.040159	0.283683	0.0401474	0.28359	0.0401407	0.283977	0.0401217
Linear	FALSE			0.283496	0.0400959	0.28422	0.0401883	0.283565	0.0401828	0.283969	0.0401623	0.283592	0.0401564	0.283586	0.0401429	0.283508	0.0401356	0.283877	0.0401188
Data Range	N23:R28			0.283545	0.0401021	0.284347	0.0402044	0.283446	0.0401794	0.283868	0.040159	0.283473	0.0401533	0.28349	0.0401379	0.283426	0.0401303	0.283774	0.0401155
Filled Symbols	FALSE			0.283593	0.0401083	IsoLine	IsoLine	0.283326	0.0401755	0.283767	0.0401553	0.283353	0.0401497	0.283399	0.0401327	0.283348	0.0401248	0.283671	0.0401118
ConcAge	FALSE			0.283642	0.0401145			0.283208	0.0401713	0.283668	0.0401512	0.283234	0.0401458	0.283313	0.0401274	0.283275	0.0401192	0.283569	0.0401077
ConcSwap	FALSE			0.283691	0.0401207			0.283094	0.0401668	0.283572	0.0401469	0.28312	0.0401415	0.283237	0.040122	0.28321	0.0401138	0.283471	0.0401033
1st Symbol-row	1			0.283739	0.0401269			0.282986	0.0401621	0.283481	0.0401423	0.283012	0.0401369	0.283171	0.0401169	0.283154	0.0401087	0.283378	0.0400988
				0.283788	0.0401331			0.282887	0.0401573	0.283397	0.0401377	0.282913	0.0401322	0.283118	0.040112	0.283108	0.0401041	0.283292	0.0400941
				0.283837	0.0401393			0.282798	0.0401524	0.283322	0.040133	0.282823	0.0401275	0.28308	0.0401076	0.283075	0.0400999	0.283215	0.0400895
				0.283885	0.0401455			0.282721	0.0401477	0.283257	0.0401284	0.282746	0.0401228	0.283056	0.0401038	0.283055	0.0400965	0.283149	0.0400849
				0.283934	0.0401517			0.282657	0.040143	0.283204	0.040124	0.282683	0.0401182	0.283048	0.0401006	0.283048	0.0400938	0.283094	0.0400805
				0.283982	0.0401579			0.282609	0.0401387	0.283163	0.0401198	0.282634	0.0401138	0.283056	0.0400981	0.283055	0.0400919	0.283052	0.0400764
				0.284031	0.0401641			0.282576	0.0401347	0.283135	0.0401159	0.282601	0.0401098	0.28308	0.0400965	0.283076	0.0400909	0.283024	0.0400726
				0.28408	0.0401703			0.282559	0.0401311	0.283121	0.0401125	0.282584	0.0401061	0.283119	0.0400958	0.283109	0.0400908	0.28301	0.0400692
				0.284128	0.0401765			0.282559	0.040128	0.283121	0.0401095	0.282584	0.0401028	0.283172	0.0400959	0.283155	0.0400917	0.28301	0.0400663
				0.284177	0.0401828			0.282576	0.0401254	0.283135	0.0401071	0.282601	0.0401001	0.283238	0.0400969	0.283211	0.0400934	0.283024	0.0400639
				0.284226	0.040189			0.282609	0.0401235	0.283163	0.0401052	0.282634	0.0400979	0.283315	0.0400987	0.283276	0.040096	0.283053	0.0400621
				0.284274	0.0401952			0.282658	0.0401222	0.283205	0.040104	0.282683	0.0400964	0.2834	0.0401014	0.283349	0.0400993	0.283095	0.040061
				0.284323	0.0402014			0.282722	0.0401215	0.283258	0.0401034	0.282747	0.0400955	0.283492	0.0401048	0.283428	0.0401033	0.28315	0.0400604
				0.284372	0.0402076			0.282799	0.0401215	0.283323	0.0401034	0.282824	0.0400952	0.283588	0.0401088	0.283509	0.0401079	0.283216	0.0400605
				0.28442	0.0402138			0.282888	0.0401222	0.283398	0.0401041	0.282914	0.0400956	0.283685	0.0401134	0.283592	0.040113	0.283293	0.0400613
				0.284469	0.04022			0.282987	0.0401236	0.283482	0.0401055	0.283013	0.0400967	0.28378	0.0401183	0.283674	0.0401183	0.283379	0.0400627
				0.284469	0.04022			0.283095	0.0401256	0.283573	0.0401074	0.283121	0.0400984	0.283872	0.0401235	0.283752	0.0401238	0.283472	0.0400647
				IsoLine	IsoLine			0.283209	0.0401282	0.283669	0.0401099	0.283236	0.0401007	0.283957	0.0401289	0.283825	0.0401294	0.28357	0.0400673
								0.283327	0.0401313	0.283769	0.040113	0.283354	0.0401035	0.284034	0.0401342	0.28389	0.0401347	0.283672	0.0400704
								0.283447	0.0401349	0.28387	0.0401165	0.283474	0.0401069	0.284099	0.0401394	0.283946	0.0401398	0.283776	0.0400739
								0.283567	0.040139	0.28397	0.0401204	0.283593	0.0401107	0.284152	0.0401442	0.283991	0.0401445	0.283878	0.0400779
								0.283683	0.0401433	0.284068	0.0401246	0.28371	0.0401148	0.284191	0.0401486	0.284024	0.0401486	0.283979	0.0400821
								0.283794	0.040148	0.284162	0.0401291	0.283821	0.0401193	0.284215	0.0401525	0.284045	0.0401521	0.284075	0.0400866
								0.283898	0.0401528	0.28425	0.0401337	0.283925	0.0401239	0.284222	0.0401557	0.284051	0.0401548	0.284164	0.0400912
								0.283992	0.0401576	0.284329	0.0401384	0.28402	0.0401286	Black	Black	Black	Black	0.284246	0.0400959
								0.284076	0.0401624	0.284399	0.040143	0.284103	0.0401333					0.284317	0.0401005
								0.284146	0.0401671	0.284459	0.0401475	0.284174	0.040138					0.284378	0.040105
								0.284202	0.0401716	0.284506	0.0401519	0.28423	0.0401425					0.284427	0.0401093
								0.284243	0.0401758	0.28454	0.0401559	0.284271	0.0401467					0.284462	0.0401132
								0.284268	0.0401796	0.284561	0.0401595	0.284296	0.0401506					0.284483	0.0401168
								0.284276	0.040183	0.284568	0.0401627	0.284304	0.0401541					0.28449	0.04012
								Black	Black	Black	Black	Black	Black					Black	Black

## Sheet: PlotDat4
Source sheet	U-Pb Data Table	0.284533	0.0402911	0.284469	0.04022	0.28422	0.0401883	0.285133	0.0403183	0.28557	0.0403164	0.285196	0.0403102	0.285457	0.0403017	0.285163	0.040302	0.285896	0.0402971
Plot name	Concordia4	0.28498	0.0402886	0.284469	0.04022	0.284284	0.0401964	0.285127	0.0403205	0.285564	0.0403185	0.28519	0.0403123	0.285453	0.0403043	0.285157	0.0403037	0.285891	0.0402996
Plot Type	1	0.284644	0.0402825	0.284501	0.0402241	0.284347	0.0402044	0.28511	0.0403222	0.285547	0.04032	0.285174	0.0403138	0.285439	0.0403067	0.285142	0.0403048	0.285878	0.040302
1st free col	21	0.284421	0.0402757	0.284534	0.0402283	0.28441	0.0402125	0.285081	0.0403233	0.285518	0.0403209	0.285148	0.0403147	0.285417	0.0403088	0.285117	0.0403052	0.285857	0.040304
Sigma Level	2	0.284633	0.0402732	0.284566	0.0402324	0.284473	0.0402206	0.285042	0.0403237	0.28548	0.0403212	0.285111	0.040315	0.285387	0.0403106	0.285082	0.040305	0.285827	0.0403058
Absolute Errs	FALSE	0.284884	0.0402723	0.284599	0.0402366	0.284537	0.0402286	0.284992	0.0403236	0.285431	0.0403209	0.285066	0.0403146	0.285348	0.0403121	0.285038	0.0403042	0.285789	0.0403074
Symbol Type	1	IsoLine	IsoLine	0.284631	0.0402407	0.2846	0.0402367	0.284934	0.0403227	0.285374	0.0403199	0.285013	0.0403136	0.285301	0.0403133	0.284987	0.0403028	0.285744	0.0403086
Inverse Plot	FALSE			0.284664	0.0402448	0.284663	0.0402448	0.284868	0.0403213	0.285309	0.0403183	0.284952	0.040312	0.285247	0.0403142	0.284929	0.0403009	0.285691	0.0403095
Color Plot	FALSE			0.284696	0.040249	0.284726	0.0402528	0.284795	0.0403193	0.285238	0.0403162	0.284885	0.0403099	0.285186	0.0403147	0.284865	0.0402983	0.285631	0.0403101
3D plot	FALSE			0.284729	0.0402531	0.28479	0.0402609	0.284718	0.0403167	0.285161	0.0403135	0.284814	0.0403072	0.285118	0.040315	0.284796	0.0402953	0.285565	0.0403104
Linear	FALSE			0.284761	0.0402572	0.284853	0.040269	0.284637	0.0403137	0.285082	0.0403103	0.284739	0.040304	0.285045	0.0403148	0.284724	0.0402919	0.285493	0.0403103
Data Range	N31:R36			0.284793	0.0402614	0.284916	0.040277	0.284553	0.0403102	0.285	0.0403067	0.284662	0.0403004	0.284966	0.0403144	0.284651	0.0402881	0.285416	0.0403099
Filled Symbols	FALSE			0.284826	0.0402655	0.28498	0.0402851	0.28447	0.0403063	0.284917	0.0403027	0.284585	0.0402964	0.284882	0.0403136	0.284577	0.040284	0.285334	0.0403092
ConcAge	FALSE			0.284858	0.0402697	0.285043	0.0402932	0.284387	0.0403021	0.284836	0.0402985	0.28451	0.0402922	0.284795	0.0403125	0.284504	0.0402797	0.285249	0.0403082
ConcSwap	FALSE			0.284891	0.0402738	0.285106	0.0403013	0.284307	0.0402977	0.284758	0.0402941	0.284436	0.0402878	0.284704	0.0403111	0.284434	0.0402753	0.28516	0.0403069
1st Symbol-row	1			0.284923	0.0402779	0.285169	0.0403093	0.284232	0.0402932	0.284684	0.0402895	0.284367	0.0402833	0.284611	0.0403094	0.284368	0.0402708	0.285069	0.0403053
				0.284956	0.0402821	0.285233	0.0403174	0.284163	0.0402887	0.284616	0.040285	0.284303	0.0402788	0.284516	0.0403074	0.284306	0.0402664	0.284977	0.0403034
				0.284988	0.0402862	0.285296	0.0403255	0.284101	0.0402842	0.284555	0.0402805	0.284246	0.0402743	0.28442	0.0403051	0.284252	0.0402621	0.284883	0.0403012
				0.285021	0.0402903	0.285359	0.0403335	0.284047	0.0402798	0.284502	0.0402762	0.284197	0.04027	0.284325	0.0403026	0.284204	0.0402581	0.28479	0.0402988
				0.285053	0.0402945	IsoLine	IsoLine	0.284003	0.0402757	0.284459	0.0402721	0.284156	0.040266	0.28423	0.0402998	0.284165	0.0402543	0.284697	0.0402962
				0.285085	0.0402986			0.283969	0.0402718	0.284425	0.0402684	0.284125	0.0402622	0.284137	0.0402968	0.284135	0.0402509	0.284606	0.0402933
				0.285118	0.0403028			0.283946	0.0402683	0.284403	0.040265	0.284104	0.0402589	0.284046	0.0402937	0.284115	0.0402479	0.284518	0.0402903
				0.28515	0.0403069			0.283934	0.0402653	0.284391	0.0402621	0.284093	0.040256	0.283958	0.0402904	0.284105	0.0402454	0.284432	0.0402871
				0.285183	0.040311			0.283934	0.0402628	0.284392	0.0402597	0.284093	0.0402537	0.283875	0.040287	0.284105	0.0402435	0.284351	0.0402838
				0.285215	0.0403152			0.283946	0.0402608	0.284403	0.0402579	0.284104	0.0402518	0.283796	0.0402835	0.284115	0.0402421	0.284273	0.0402804
				0.285248	0.0403193			0.283969	0.0402594	0.284426	0.0402566	0.284126	0.0402506	0.283722	0.0402799	0.284136	0.0402414	0.284202	0.040277
				0.28528	0.0403234			0.284003	0.0402587	0.284459	0.040256	0.284157	0.0402501	0.283655	0.0402763	0.284166	0.0402412	0.284136	0.0402735
				0.285313	0.0403276			0.284048	0.0402585	0.284503	0.0402561	0.284198	0.0402501	0.283594	0.0402726	0.284205	0.0402417	0.284076	0.04027
				0.285345	0.0403317			0.284102	0.040259	0.284556	0.0402567	0.284248	0.0402508	0.28354	0.040269	0.284253	0.0402428	0.284023	0.0402665
				0.285378	0.0403359			0.284164	0.0402602	0.284617	0.040258	0.284305	0.0402521	0.283493	0.0402655	0.284308	0.0402445	0.283978	0.040263
				0.28541	0.04034			0.284234	0.0402619	0.284686	0.0402599	0.284369	0.040254	0.283455	0.040262	0.284369	0.0402468	0.28394	0.0402596
				0.28541	0.04034			0.284309	0.0402642	0.28476	0.0402623	0.284438	0.0402564	0.283424	0.0402587	0.284435	0.0402495	0.28391	0.0402564
				IsoLine	IsoLine			0.284389	0.040267	0.284838	0.0402653	0.284511	0.0402593	0.283402	0.0402555	0.284506	0.0402528	0.283889	0.0402533
								0.284471	0.0402703	0.284919	0.0402687	0.284587	0.0402627	0.283389	0.0402525	0.284578	0.0402564	0.283876	0.0402503
								0.284555	0.040274	0.285001	0.0402724	0.284664	0.0402665	0.283385	0.0402497	0.284652	0.0402603	0.283872	0.0402475
								0.284638	0.040278	0.285083	0.0402766	0.284741	0.0402706	0.283389	0.0402471	0.284726	0.0402645	0.283876	0.040245
								0.284719	0.0402823	0.285163	0.0402809	0.284815	0.0402749	0.283403	0.0402447	0.284797	0.0402689	0.283889	0.0402426
								0.284797	0.0402868	0.285239	0.0402854	0.284887	0.0402794	0.283425	0.0402426	0.284866	0.0402734	0.283911	0.0402406
								0.284869	0.0402913	0.28531	0.0402899	0.284953	0.0402839	0.283455	0.0402408	0.28493	0.0402778	0.283941	0.0402388
								0.284935	0.0402959	0.285375	0.0402944	0.285014	0.0402884	0.283494	0.0402393	0.284988	0.0402822	0.283978	0.0402372
								0.284993	0.0403003	0.285432	0.0402989	0.285067	0.0402928	0.28354	0.0402381	0.285039	0.0402864	0.284024	0.040236
								0.285043	0.0403046	0.285481	0.0403031	0.285112	0.040297	0.283595	0.0402372	0.285083	0.0402903	0.284077	0.0402351
								0.285082	0.0403086	0.285519	0.040307	0.285148	0.0403009	0.283656	0.0402367	0.285117	0.0402939	0.284137	0.0402345
								0.28511	0.0403122	0.285547	0.0403106	0.285175	0.0403045	0.283723	0.0402364	0.285142	0.0402971	0.284203	0.0402342
								0.285128	0.0403155	0.285564	0.0403137	0.285191	0.0403076	0.283797	0.0402366	0.285158	0.0402998	0.284275	0.0402343
								0.285133	0.0403183	0.28557	0.0403164	0.285196	0.0403102	0.283876	0.040237	0.285163	0.040302	0.284352	0.0402347
								Black	Black	Black	Black	Black	Black	0.28396	0.0402378	Black	Black	0.284433	0.0402354
														0.284047	0.0402389			0.284519	0.0402364
														0.284138	0.0402403			0.284608	0.0402377
														0.284231	0.040242			0.284699	0.0402393
														0.284326	0.040244			0.284791	0.0402412
														0.284422	0.0402463			0.284885	0.0402434
														0.284517	0.0402488			0.284978	0.0402458
														0.284612	0.0402516			0.285071	0.0402484
														0.284705	0.0402546			0.285161	0.0402513
														0.284796	0.0402577			0.28525	0.0402543
														0.284883	0.040261			0.285336	0.0402575
														0.284967	0.0402644			0.285417	0.0402608
														0.285046	0.0402679			0.285494	0.0402642
														0.285119	0.0402715			0.285566	0.0402676
														0.285187	0.0402751			0.285632	0.0402711
														0.285248	0.0402788			0.285692	0.0402747
														0.285302	0.0402824			0.285745	0.0402782
														0.285349	0.0402859			0.28579	0.0402816
														0.285387	0.0402894			0.285828	0.040285
														0.285418	0.0402927			0.285857	0.0402882
														0.28544	0.0402959			0.285879	0.0402913
														0.285453	0.0402989			0.285892	0.0402943
														0.285457	0.0403017			0.285896	0.0402971
														Black	Black			Black	Black

## Sheet: PlotDat5
Source sheet	U-Pb Data Table	0.28573	0.040379	0.284469	0.04022	0.28422	0.0401883	0.286392	0.0404067	0.287891	0.0404116	0.288646	0.0403901	0.285704	0.0403318	0.287487	0.0403239	0.285566	0.0403139
Plot name	Concordia5	0.285083	0.0403775	0.284469	0.04022	0.284347	0.0402044	0.286383	0.0404099	0.287863	0.040417	0.288631	0.0403951	0.285694	0.0403351	0.287465	0.0403289	0.285556	0.0403172
Plot Type	1	0.285072	0.0403476	0.284534	0.0402283	0.284473	0.0402206	0.286356	0.0404123	0.287782	0.0404216	0.288585	0.0403997	0.285665	0.0403378	0.2874	0.0403331	0.285528	0.0403197
1st free col	21	0.284684	0.0403073	0.284599	0.0402365	0.2846	0.0402367	0.286312	0.0404138	0.287648	0.0404254	0.288509	0.0404038	0.285616	0.04034	0.287294	0.0403367	0.285481	0.0403212
Sigma Level	2	0.285254	0.0402952	0.284664	0.0402448	0.284726	0.0402528	0.286252	0.0404143	0.287464	0.0404282	0.288404	0.0404075	0.285549	0.0403415	0.287147	0.0403394	0.285417	0.0403217
Absolute Errs	FALSE	0.284861	0.0402858	0.284729	0.0402531	0.284853	0.040269	0.286178	0.0404138	0.287234	0.0404301	0.288271	0.0404107	0.285465	0.0403423	0.286964	0.0403413	0.285338	0.0403213
Symbol Type	1	IsoLine	IsoLine	0.284793	0.0402614	0.28498	0.0402851	0.286092	0.0404125	0.286961	0.0404309	0.28811	0.0404133	0.285366	0.0403425	0.286748	0.0403423	0.285246	0.0403199
Inverse Plot	FALSE			0.284858	0.0402697	0.285106	0.0403013	0.285995	0.0404101	0.286653	0.0404307	0.287924	0.0404153	0.285254	0.040342	0.286502	0.0403423	0.285143	0.0403176
Color Plot	FALSE			0.284923	0.0402779	0.285233	0.0403174	0.285892	0.040407	0.286314	0.0404295	0.287713	0.0404168	0.285131	0.0403408	0.286233	0.0403415	0.285033	0.0403144
3D plot	FALSE			0.284988	0.0402862	0.285359	0.0403335	0.285784	0.0404031	0.28595	0.0404272	0.287479	0.0404177	0.284999	0.040339	0.285944	0.0403397	0.284918	0.0403104
Linear	FALSE			0.285053	0.0402945	0.285486	0.0403497	0.285675	0.0403985	0.28557	0.040424	0.287225	0.040418	0.284861	0.0403365	0.285642	0.0403371	0.284802	0.0403058
Data Range	N39:R44			0.285118	0.0403028	0.285612	0.0403658	0.285567	0.0403934	0.285181	0.0404199	0.286953	0.0404177	0.284719	0.0403335	0.285332	0.0403336	0.284687	0.0403006
Filled Symbols	FALSE			0.285183	0.040311	0.285739	0.0403819	0.285463	0.0403879	0.284789	0.0404149	0.286664	0.0404168	0.284577	0.04033	0.28502	0.0403294	0.284577	0.040295
ConcAge	FALSE			0.285248	0.0403193	0.285866	0.0403981	0.285367	0.0403822	0.284403	0.0404092	0.286362	0.0404153	0.284437	0.040326	0.284714	0.0403246	0.284474	0.0402892
ConcSwap	FALSE			0.285313	0.0403276	0.285992	0.0404142	0.285281	0.0403763	0.284031	0.0404029	0.286049	0.0404132	0.284301	0.0403217	0.284418	0.0403191	0.284382	0.0402832
1st Symbol-row	1			0.285378	0.0403359	0.286119	0.0404304	0.285207	0.0403706	0.283679	0.0403961	0.285728	0.0404106	0.284173	0.040317	0.284138	0.0403133	0.284304	0.0402774
				0.285442	0.0403441	0.286246	0.0404465	0.285147	0.040365	0.283354	0.0403889	0.285401	0.0404074	0.284055	0.0403122	0.283879	0.040307	0.28424	0.0402718
				0.285507	0.0403524	IsoLine	IsoLine	0.285104	0.0403599	0.283063	0.0403816	0.285071	0.0404037	0.28395	0.0403074	0.283648	0.0403005	0.284193	0.0402665
				0.285572	0.0403607			0.285077	0.0403553	0.282811	0.0403741	0.284741	0.0403996	0.283858	0.0403025	0.283448	0.0402939	0.284165	0.0402618
				0.285637	0.040369			0.285068	0.0403513	0.282604	0.0403667	0.284414	0.0403949	0.283783	0.0402977	0.283283	0.0402874	0.284155	0.0402577
				0.285702	0.0403772			0.285077	0.0403481	0.282445	0.0403595	0.284093	0.0403899	0.283725	0.040293	0.283156	0.040281	0.284165	0.0402545
				0.285767	0.0403855			0.285104	0.0403457	0.282337	0.0403527	0.28378	0.0403846	0.283686	0.0402887	0.283071	0.0402748	0.284194	0.040252
				0.285832	0.0403938			0.285148	0.0403442	0.282282	0.0403463	0.283478	0.0403789	0.283666	0.0402847	0.283027	0.0402691	0.284241	0.0402505
				0.285897	0.0404021			0.285208	0.0403437	0.282282	0.0403406	0.28319	0.0403729	0.283666	0.0402812	0.283027	0.0402639	0.284305	0.04025
				0.285962	0.0404103			0.285282	0.0403441	0.282337	0.0403355	0.282917	0.0403668	0.283686	0.0402782	0.283071	0.0402592	0.284384	0.0402504
				0.286027	0.0404186			0.285369	0.0403455	0.282445	0.0403313	0.282663	0.0403604	0.283725	0.0402757	0.283157	0.0402553	0.284476	0.0402518
				0.286092	0.0404269			0.285465	0.0403478	0.282604	0.040328	0.28243	0.040354	0.283783	0.0402739	0.283283	0.0402522	0.284578	0.0402541
				0.286157	0.0404352			0.285569	0.040351	0.282812	0.0403257	0.282219	0.0403475	0.283859	0.0402727	0.283448	0.0402499	0.284688	0.0402573
				0.286222	0.0404434			0.285676	0.0403549	0.283064	0.0403243	0.282033	0.040341	0.28395	0.0402722	0.283649	0.0402484	0.284803	0.0402613
				0.286287	0.0404517			0.285786	0.0403595	0.283355	0.040324	0.281872	0.0403345	0.284056	0.0402724	0.28388	0.0402479	0.28492	0.0402659
				0.286352	0.04046			0.285894	0.0403646	0.28368	0.0403247	0.281739	0.0403282	0.284174	0.0402732	0.284138	0.0402483	0.285035	0.0402711
				0.286352	0.04046			0.285997	0.0403701	0.284032	0.0403265	0.281634	0.040322	0.284302	0.0402747	0.284418	0.0402496	0.285145	0.0402767
				IsoLine	IsoLine			0.286093	0.0403758	0.284404	0.0403292	0.281558	0.0403161	0.284438	0.0402769	0.284715	0.0402518	0.285247	0.0402825
								0.286179	0.0403816	0.28479	0.0403329	0.281513	0.0403104	0.284578	0.0402796	0.285021	0.0402549	0.285339	0.0402885
								0.286253	0.0403874	0.285182	0.0403375	0.281498	0.0403051	0.28472	0.0402829	0.285333	0.0402587	0.285418	0.0402943
								0.286313	0.0403929	0.285571	0.0403428	0.281513	0.0403001	0.284862	0.0402867	0.285642	0.0402632	0.285482	0.0402999
								0.286357	0.0403981	0.285951	0.0403488	0.281559	0.0402955	0.285	0.0402908	0.285945	0.0402684	0.285528	0.0403052
								0.286384	0.0404027	0.286314	0.0403554	0.281634	0.0402913	0.285132	0.0402953	0.286233	0.0402741	0.285557	0.0403099
								0.286392	0.0404067	0.286654	0.0403624	0.281739	0.0402876	0.285255	0.0403	0.286503	0.0402802	0.285566	0.0403139
								Black	Black	0.286962	0.0403697	0.281873	0.0402845	0.285367	0.0403049	0.286749	0.0402865	Black	Black
										0.287234	0.0403771	0.282033	0.0402819	0.285466	0.0403098	0.286965	0.0402931
										0.287464	0.0403846	0.28222	0.0402798	0.28555	0.0403146	0.287148	0.0402997
										0.287648	0.0403919	0.282431	0.0402783	0.285617	0.0403194	0.287294	0.0403062
										0.287782	0.0403989	0.282664	0.0402774	0.285665	0.0403238	0.287401	0.0403125
										0.287864	0.0404055	0.282918	0.0402772	0.285695	0.040328	0.287465	0.0403184
										0.287891	0.0404116	0.283191	0.0402775	0.285704	0.0403318	0.287487	0.0403239
										Black	Black	0.283479	0.0402784	Black	Black	Black	Black
												0.283781	0.0402799
												0.284094	0.0402819
												0.284416	0.0402846
												0.284743	0.0402878
												0.285072	0.0402914
												0.285402	0.0402956
												0.285729	0.0403002
												0.28605	0.0403052
												0.286363	0.0403106
												0.286665	0.0403163
												0.286954	0.0403222
												0.287226	0.0403284
												0.28748	0.0403347
												0.287714	0.0403412
												0.287924	0.0403477
												0.288111	0.0403542
												0.288272	0.0403606
												0.288405	0.040367
												0.28851	0.0403731
												0.288585	0.0403791
												0.288631	0.0403847
												0.288646	0.0403901
												Black	Black

## Sheet: PlotDat6
Source sheet	U-Pb Data Table	0.286441	0.0405048	0.28541	0.04034	0.285486	0.0403497	0.287047	0.0405324	0.28626	0.0404783	0.286282	0.040465	0.286497	0.0404547	0.286999	0.0404429	0.286257	0.040436
Plot name	Concordia6	0.285778	0.0404484	0.28541	0.04034	0.285612	0.0403658	0.287039	0.0405351	0.28625	0.0404799	0.286272	0.0404663	0.286489	0.0404572	0.286987	0.0404464	0.286249	0.0404383
Plot Type	1	0.28582	0.0404344	0.285475	0.0403483	0.285739	0.0403819	0.287014	0.0405369	0.286218	0.0404802	0.286242	0.0404662	0.286464	0.0404588	0.286954	0.040449	0.286227	0.0404397
1st free col	21	0.285898	0.040427	0.28554	0.0403565	0.285866	0.0403981	0.286974	0.0405378	0.286168	0.0404791	0.286194	0.0404648	0.286424	0.0404596	0.286899	0.0404508	0.286191	0.0404403
Sigma Level	2	0.286175	0.0404173	0.285605	0.0403648	0.285992	0.0404142	0.286919	0.0405378	0.2861	0.0404766	0.286129	0.040462	0.28637	0.0404594	0.286824	0.0404517	0.286141	0.0404399
Absolute Errs	FALSE	0.28571	0.0404068	0.28567	0.0403731	0.286119	0.0404304	0.286851	0.040537	0.286019	0.0404729	0.286051	0.040458	0.286303	0.0404584	0.286732	0.0404516	0.28608	0.0404386
Symbol Type	1	IsoLine	IsoLine	0.285735	0.0403814	0.286246	0.0404465	0.286772	0.0405352	0.285927	0.0404682	0.285962	0.040453	0.286225	0.0404566	0.286625	0.0404506	0.286008	0.0404365
Inverse Plot	FALSE			0.2858	0.0403897	0.286372	0.0404626	0.286684	0.0405326	0.285828	0.0404625	0.285868	0.0404471	0.286138	0.0404539	0.286505	0.0404487	0.285929	0.0404335
Color Plot	FALSE			0.285864	0.0403979	0.286499	0.0404788	0.286589	0.0405293	0.285727	0.0404563	0.285771	0.0404407	0.286044	0.0404505	0.286376	0.0404459	0.285843	0.0404298
3D plot	FALSE			0.285929	0.0404062	0.286626	0.0404949	0.28649	0.0405253	0.285629	0.0404497	0.285677	0.0404341	0.285947	0.0404465	0.286242	0.0404424	0.285754	0.0404255
Linear	FALSE			0.285994	0.0404145	0.286752	0.0405111	0.28639	0.0405208	0.285537	0.040443	0.285588	0.0404274	0.285848	0.0404419	0.286106	0.0404381	0.285664	0.0404207
Data Range	N47:R52			0.286059	0.0404228	0.286879	0.0405272	0.286292	0.0405158	0.285455	0.0404366	0.28551	0.0404211	0.28575	0.0404369	0.285972	0.0404333	0.285575	0.0404155
Filled Symbols	FALSE			0.286124	0.040431	0.287006	0.0405433	0.286197	0.0405105	0.285388	0.0404307	0.285446	0.0404153	0.285657	0.0404317	0.285843	0.0404281	0.285489	0.0404101
ConcAge	FALSE			0.286189	0.0404393	0.287133	0.0405595	0.286109	0.040505	0.285338	0.0404256	0.285397	0.0404104	0.28557	0.0404263	0.285723	0.0404226	0.28541	0.0404045
ConcSwap	FALSE			0.286254	0.0404476	0.28726	0.0405756	0.28603	0.0404996	0.285307	0.0404214	0.285368	0.0404065	0.285492	0.0404209	0.285616	0.0404169	0.285339	0.0403991
1st Symbol-row	1			0.286319	0.0404559	IsoLine	IsoLine	0.285963	0.0404942	0.285296	0.0404185	0.285358	0.0404039	0.285425	0.0404157	0.285524	0.0404112	0.285278	0.0403938
				0.286384	0.0404641			0.285908	0.0404892	0.285307	0.0404168	0.285368	0.0404025	0.285371	0.0404109	0.28545	0.0404057	0.285229	0.0403889
				0.286449	0.0404724			0.285868	0.0404846	0.285338	0.0404166	0.285398	0.0404026	0.285331	0.0404064	0.285395	0.0404005	0.285192	0.0403845
				0.286514	0.0404807			0.285843	0.0404806	0.285389	0.0404177	0.285446	0.0404041	0.285307	0.0404025	0.285362	0.0403958	0.28517	0.0403807
				0.286579	0.040489			0.285835	0.0404772	0.285456	0.0404201	0.285511	0.0404069	0.285299	0.0403993	0.285351	0.0403916	0.285163	0.0403776
				0.286644	0.0404972			0.285844	0.0404746	0.285538	0.0404238	0.285589	0.0404108	0.285308	0.0403969	0.285362	0.0403882	0.285171	0.0403753
				0.286709	0.0405055			0.285868	0.0404728	0.28563	0.0404286	0.285678	0.0404159	0.285332	0.0403952	0.285396	0.0403856	0.285193	0.0403738
				0.286774	0.0405138			0.285909	0.0404718	0.285729	0.0404342	0.285772	0.0404217	0.285372	0.0403945	0.28545	0.0403838	0.285229	0.0403733
				0.286839	0.0405221			0.285964	0.0404718	0.285829	0.0404405	0.285869	0.0404281	0.285426	0.0403946	0.285525	0.0403829	0.285279	0.0403737
				0.286904	0.0405303			0.286032	0.0404727	0.285928	0.0404471	0.285963	0.0404348	0.285493	0.0403956	0.285617	0.040383	0.28534	0.0403749
				0.286969	0.0405386			0.286111	0.0404744	0.28602	0.0404537	0.286052	0.0404414	0.285571	0.0403975	0.285725	0.040384	0.285412	0.0403771
				0.287034	0.0405469			0.286199	0.040477	0.286101	0.0404601	0.28613	0.0404477	0.285658	0.0404001	0.285844	0.0403859	0.285491	0.04038
				0.287099	0.0405552			0.286293	0.0404803	0.286169	0.040466	0.286194	0.0404535	0.285752	0.0404035	0.285973	0.0403887	0.285577	0.0403837
				0.287164	0.0405634			0.286392	0.0404843	0.286219	0.0404712	0.286243	0.0404584	0.285849	0.0404076	0.286107	0.0403922	0.285666	0.040388
				0.287229	0.0405717			0.286492	0.0404889	0.28625	0.0404753	0.286272	0.0404623	0.285948	0.0404121	0.286243	0.0403964	0.285756	0.0403928
				0.287294	0.04058			0.286591	0.0404939	0.28626	0.0404783	0.286282	0.040465	0.286046	0.0404171	0.286378	0.0404013	0.285845	0.040398
				0.287294	0.04058			0.286685	0.0404992	Black	Black	Black	Black	0.286139	0.0404224	0.286506	0.0404065	0.28593	0.0404035
				IsoLine	IsoLine			0.286773	0.0405046					0.286226	0.0404277	0.286626	0.040412	0.28601	0.040409
								0.286852	0.0405101					0.286304	0.0404331	0.286733	0.0404177	0.286081	0.0404145
								0.28692	0.0405154					0.286371	0.0404383	0.286825	0.0404234	0.286142	0.0404197
								0.286975	0.0405204					0.286425	0.0404432	0.2869	0.0404289	0.286191	0.0404247
								0.287015	0.040525					0.286465	0.0404476	0.286954	0.0404341	0.286227	0.0404291
								0.287039	0.0405291					0.286489	0.0404515	0.286987	0.0404388	0.28625	0.0404329
								0.287047	0.0405324					0.286497	0.0404547	0.286999	0.0404429	0.286257	0.040436
								Black	Black					Black	Black	Black	Black	Black	Black

## Sheet: PlotDat7
Source sheet	U-Pb Data Table	0.287544	0.0405665	0.28643	0.04047	0.286752	0.0405111	0.287947	0.040576	0.287354	0.0405582	0.28754	0.0405413	0.287796	0.040533	0.287605	0.0405297	0.287591	0.0405225	0.287176	0.0405162
Plot name	Concordia7	0.28718	0.0405438	0.28643	0.04047	0.286879	0.0405272	0.287943	0.0405778	0.28735	0.0405588	0.287538	0.0405424	0.287793	0.0405345	0.287601	0.0405314	0.287587	0.0405242	0.287173	0.0405181
Plot Type	1	0.287361	0.0405284	0.286465	0.0404745	0.287006	0.0405433	0.287932	0.0405793	0.287339	0.0405587	0.287531	0.0405432	0.287784	0.0405356	0.28759	0.0405328	0.287578	0.0405256	0.287163	0.0405196
1st free col	23	0.287574	0.0405221	0.286501	0.040479	0.287133	0.0405595	0.287912	0.0405807	0.287321	0.040558	0.287519	0.0405435	0.287769	0.0405363	0.287571	0.0405339	0.287562	0.0405266	0.287146	0.0405208
Sigma Level	2	0.287322	0.0405199	0.286536	0.0404834	0.28726	0.0405756	0.287886	0.0405817	0.287296	0.0405567	0.287502	0.0405434	0.287749	0.0405367	0.287545	0.0405345	0.28754	0.0405271	0.287123	0.0405215
Absolute Errs	FALSE	0.287353	0.0405116	0.286571	0.0404879	0.287386	0.0405918	0.287853	0.0405825	0.287267	0.0405548	0.287482	0.0405429	0.287724	0.0405366	0.287514	0.0405348	0.287514	0.0405273	0.287095	0.0405218
Symbol Type	1	0.286926	0.0405057	0.286606	0.0404924	IsoLine	IsoLine	0.287814	0.040583	0.287233	0.0405524	0.287459	0.040542	0.287695	0.0405362	0.287477	0.0405346	0.287483	0.040527	0.287063	0.0405217
Inverse Plot	FALSE	IsoLine	IsoLine	0.286641	0.0404969			0.287769	0.0405831	0.287198	0.0405496	0.287433	0.0405408	0.287663	0.0405353	0.287436	0.0405341	0.287448	0.0405263	0.287026	0.0405211
Color Plot	FALSE			0.286676	0.0405014			0.28772	0.0405829	0.287161	0.0405466	0.287404	0.0405392	0.287628	0.0405341	0.287392	0.0405331	0.287411	0.0405252	0.286987	0.0405201
3D plot	FALSE			0.286712	0.0405059			0.287668	0.0405824	0.287126	0.0405435	0.287375	0.0405373	0.287592	0.0405326	0.287345	0.0405318	0.287372	0.0405237	0.286947	0.0405188
Linear	FALSE			0.286747	0.0405103			0.287614	0.0405816	0.287092	0.0405404	0.287346	0.0405352	0.287555	0.0405308	0.287299	0.0405302	0.287333	0.0405219	0.286905	0.040517
Data Range	N55:R61			0.286782	0.0405148			0.287558	0.0405805	0.287063	0.0405375	0.287316	0.0405329	0.287519	0.0405288	0.287253	0.0405283	0.287295	0.0405198	0.286865	0.040515
Filled Symbols	FALSE			0.286817	0.0405193			0.287501	0.0405791	0.287039	0.0405348	0.287288	0.0405304	0.287484	0.0405266	0.287209	0.0405262	0.287258	0.0405175	0.286826	0.0405127
ConcAge	FALSE			0.286852	0.0405238			0.287446	0.0405775	0.28702	0.0405325	0.287262	0.0405279	0.287452	0.0405242	0.287167	0.0405239	0.287223	0.040515	0.286789	0.0405102
ConcSwap	FALSE			0.286888	0.0405283			0.287392	0.0405756	0.287009	0.0405307	0.287239	0.0405255	0.287423	0.0405218	0.287131	0.0405214	0.287192	0.0405125	0.286757	0.0405076
1st Symbol-row	1			0.286923	0.0405328			0.287342	0.0405736	0.287005	0.0405295	0.287219	0.0405231	0.287399	0.0405194	0.287099	0.040519	0.287166	0.0405099	0.286729	0.040505
				0.286958	0.0405372			0.287295	0.0405715	0.287009	0.0405289	0.287203	0.0405208	0.287378	0.0405171	0.287074	0.0405165	0.287145	0.0405073	0.286706	0.0405023
				0.286993	0.0405417			0.287253	0.0405692	0.287021	0.040529	0.287191	0.0405188	0.287364	0.0405149	0.287055	0.0405142	0.287129	0.0405049	0.28669	0.0404998
				0.287028	0.0405462			0.287217	0.0405669	0.287039	0.0405297	0.287184	0.040517	0.287355	0.0405129	0.287043	0.040512	0.287119	0.0405026	0.28668	0.0404974
				0.287064	0.0405507			0.287187	0.0405646	0.287063	0.040531	0.287181	0.0405155	0.287352	0.0405112	0.28704	0.04051	0.287116	0.0405006	0.286676	0.0404952
				0.287099	0.0405552			0.287164	0.0405623	0.287093	0.0405329	0.287184	0.0405144	0.287355	0.0405097	0.287044	0.0405083	0.28712	0.0404989	0.28668	0.0404934
				0.287134	0.0405597			0.287149	0.0405601	0.287126	0.0405353	0.287191	0.0405137	0.287364	0.0405086	0.287055	0.0405069	0.287129	0.0404975	0.28669	0.0404919
				0.287169	0.0405641			0.287141	0.0405581	0.287162	0.0405381	0.287203	0.0405134	0.287379	0.0405079	0.287074	0.0405059	0.287145	0.0404965	0.286707	0.0404907
				0.287204	0.0405686			0.287141	0.0405562	0.287198	0.0405411	0.28722	0.0405135	0.287399	0.0405076	0.2871	0.0405052	0.287167	0.040496	0.28673	0.04049
				0.28724	0.0405731			0.287149	0.0405545	0.287234	0.0405442	0.28724	0.0405139	0.287424	0.0405076	0.287131	0.040505	0.287193	0.0404958	0.286758	0.0404897
				0.287275	0.0405776			0.287165	0.040553	0.287267	0.0405473	0.287263	0.0405148	0.287453	0.040508	0.287168	0.0405051	0.287224	0.0404961	0.28679	0.0404898
				0.28731	0.0405821			0.287188	0.0405518	0.287297	0.0405502	0.287289	0.0405161	0.287485	0.0405089	0.287209	0.0405057	0.287259	0.0404968	0.286827	0.0404904
				0.287345	0.0405866			0.287217	0.0405509	0.287321	0.0405529	0.287317	0.0405177	0.28752	0.0405101	0.287253	0.0405066	0.287296	0.0404979	0.286866	0.0404913
				0.28738	0.040591			0.287254	0.0405503	0.287339	0.0405552	0.287347	0.0405196	0.287556	0.0405116	0.2873	0.0405079	0.287334	0.0404994	0.286906	0.0404927
				0.287416	0.0405955			0.287296	0.04055	0.28735	0.040557	0.287376	0.0405217	0.287593	0.0405134	0.287346	0.0405095	0.287374	0.0405012	0.286948	0.0404944
				0.287451	0.0406			0.287342	0.04055	0.287354	0.0405582	0.287406	0.040524	0.287629	0.0405154	0.287392	0.0405114	0.287412	0.0405033	0.286988	0.0404965
				0.287451	0.0406			0.287393	0.0405504	Black	Black	0.287434	0.0405264	0.287664	0.0405176	0.287436	0.0405136	0.287449	0.0405056	0.287027	0.0404988
				IsoLine	IsoLine			0.287446	0.040551			0.28746	0.0405289	0.287696	0.04052	0.287478	0.0405159	0.287484	0.0405081	0.287064	0.0405013
								0.287502	0.040552			0.287483	0.0405314	0.287725	0.0405224	0.287514	0.0405183	0.287514	0.0405106	0.287096	0.0405039
								0.287558	0.0405532			0.287503	0.0405338	0.28775	0.0405248	0.287546	0.0405208	0.287541	0.0405132	0.287124	0.0405065
								0.287614	0.0405547			0.287519	0.040536	0.28777	0.0405271	0.287571	0.0405232	0.287562	0.0405158	0.287147	0.0405092
								0.287669	0.0405565			0.287531	0.0405381	0.287785	0.0405293	0.28759	0.0405256	0.287578	0.0405182	0.287163	0.0405117
								0.287721	0.0405584			0.287538	0.0405399	0.287794	0.0405313	0.287602	0.0405277	0.287587	0.0405205	0.287173	0.0405141
								0.28777	0.0405605			0.28754	0.0405413	0.287796	0.040533	0.287605	0.0405297	0.287591	0.0405225	0.287176	0.0405162
								0.287814	0.0405627			Black	Black	Black	Black	Black	Black	Black	Black	Black	Black
								0.287853	0.040565
								0.287886	0.0405673
								0.287913	0.0405696
								0.287932	0.0405718
								0.287944	0.040574
								0.287947	0.040576
								Black	Black

## Sheet: PlotDat8
Source sheet	U-Pb Data Table	0.288967	0.0407382	0.285881	0.0404	0.285486	0.0403497	0.28978	0.0407659	0.289037	0.040699	0.289341	0.0406767	0.288005	0.040635	0.287598	0.0405933	0.288935	0.040579	0.287638	0.0405656	0.287588	0.0405604
Plot name	Concordia8	0.288191	0.040674	0.285881	0.0404	0.285739	0.0403819	0.289769	0.0407696	0.289025	0.0407034	0.289326	0.0406806	0.287992	0.0406379	0.287587	0.0405951	0.288913	0.0405859	0.287627	0.0405671	0.287578	0.0405619
Plot Type	1	0.288231	0.0406485	0.286002	0.0404155	0.285992	0.0404142	0.289735	0.0407725	0.288991	0.0407071	0.289281	0.0406836	0.287954	0.0406393	0.287556	0.0405953	0.288846	0.0405919	0.287596	0.0405672	0.287546	0.040562
1st free col	25	0.287429	0.0406043	0.286124	0.040431	0.286246	0.0404465	0.289681	0.0407744	0.288934	0.0407098	0.289207	0.0406856	0.287894	0.0406391	0.287505	0.0405941	0.288738	0.0405969	0.287545	0.0405657	0.287496	0.0405607
Sigma Level	2	0.287112	0.0405606	0.286246	0.0404465	0.286499	0.0404788	0.289608	0.0407753	0.288858	0.0407116	0.289106	0.0406867	0.287813	0.0406375	0.287437	0.0405913	0.288591	0.0406007	0.287478	0.0405628	0.287429	0.0405578
Absolute Errs	FALSE	0.287307	0.0405544	0.286368	0.0404621	0.286752	0.0405111	0.289517	0.0407752	0.288763	0.0407124	0.288982	0.0406867	0.287716	0.0406344	0.287354	0.0405873	0.288409	0.0406033	0.287397	0.0405586	0.287347	0.0405537
Symbol Type	1	0.287157	0.0405329	0.28649	0.0404776	0.287006	0.0405433	0.289411	0.0407742	0.288653	0.0407121	0.288837	0.0406856	0.287606	0.04063	0.287261	0.040582	0.288197	0.0406046	0.287305	0.0405532	0.287256	0.0405485
Inverse Plot	FALSE	0.287108	0.040528	0.286611	0.0404931	0.28726	0.0405756	0.289293	0.0407721	0.28853	0.0407107	0.288676	0.0406836	0.287488	0.0406245	0.287162	0.0405758	0.287961	0.0406044	0.287206	0.040547	0.287157	0.0405424
Color Plot	FALSE	IsoLine	IsoLine	0.286733	0.0405086	0.287513	0.0406079	0.289166	0.0407691	0.288397	0.0407084	0.288503	0.0406806	0.287367	0.040618	0.28706	0.040569	0.287706	0.0406029	0.287106	0.0405402	0.287057	0.0405356
3D plot	FALSE			0.286855	0.0405241	0.287767	0.0406402	0.289033	0.0407652	0.28826	0.0407051	0.288322	0.0406767	0.28725	0.040611	0.28696	0.0405618	0.287441	0.0406001	0.287007	0.040533	0.286959	0.0405285
Linear	FALSE			0.286977	0.0405396	0.28802	0.0406725	0.288899	0.0407607	0.28812	0.040701	0.288139	0.040672	0.28714	0.0406037	0.286867	0.0405545	0.287172	0.0405961	0.286916	0.0405258	0.286867	0.0405214
Data Range	N64:R71			0.287099	0.0405552	0.288274	0.0407048	0.288767	0.0407555	0.287982	0.0406962	0.287958	0.0406667	0.287042	0.0405965	0.286785	0.0405475	0.286907	0.0405909	0.286834	0.040519	0.286786	0.0405146
Filled Symbols	FALSE			0.287221	0.0405707	0.288528	0.0407371	0.28864	0.0407498	0.28785	0.0406907	0.287784	0.0406609	0.286962	0.0405895	0.286717	0.0405411	0.286653	0.0405847	0.286767	0.0405127	0.286719	0.0405084
ConcAge	FALSE			0.287342	0.0405862	0.288782	0.0407694	0.288522	0.0407438	0.287727	0.0406848	0.287623	0.0406548	0.286902	0.0405832	0.286667	0.0405355	0.286417	0.0405777	0.286717	0.0405074	0.286669	0.040503
ConcSwap	FALSE			0.287464	0.0406017	0.289036	0.0408016	0.288416	0.0407377	0.287617	0.0406786	0.287479	0.0406485	0.286865	0.0405779	0.286635	0.040531	0.286205	0.04057	0.286686	0.0405031	0.286638	0.0404987
1st Symbol-row	1			0.287586	0.0406172	0.28929	0.0408339	0.288325	0.0407316	0.287522	0.0406722	0.287354	0.0406422	0.286852	0.0405736	0.286625	0.0405278	0.286023	0.0405619	0.286676	0.0405002	0.286628	0.0404957
				0.287708	0.0406327	IsoLine	IsoLine	0.288252	0.0407256	0.287446	0.0406659	0.287254	0.040636	0.286865	0.0405708	0.286636	0.0405261	0.285876	0.0405537	0.286686	0.0404986	0.286638	0.0404941
				0.28783	0.0406483			0.288198	0.04072	0.28739	0.0406599	0.287181	0.0406302	0.286903	0.0405694	0.286667	0.0405258	0.285768	0.0405454	0.286718	0.0404986	0.28667	0.040494
				0.287952	0.0406638			0.288165	0.0407149	0.287356	0.0406542	0.287136	0.0406249	0.286963	0.0405695	0.286718	0.0405271	0.285702	0.0405374	0.286768	0.0405001	0.28672	0.0404954
				0.288074	0.0406793			0.288154	0.0407105	0.287344	0.0406491	0.287121	0.0406203	0.287044	0.0405711	0.286786	0.0405298	0.28568	0.0405298	0.286835	0.040503	0.286787	0.0404982
				0.288196	0.0406948			0.288165	0.0407067	0.287356	0.0406446	0.287136	0.0406164	0.287141	0.0405742	0.286869	0.0405339	0.285702	0.0405229	0.286917	0.0405072	0.286868	0.0405024
				0.288318	0.0407103			0.288198	0.0407039	0.28739	0.0406409	0.287181	0.0406134	0.287251	0.0405786	0.286962	0.0405391	0.285768	0.0405169	0.287009	0.0405125	0.28696	0.0405076
				0.28844	0.0407258			0.288252	0.040702	0.287447	0.0406382	0.287255	0.0406113	0.287369	0.0405842	0.287061	0.0405453	0.285876	0.0405119	0.287107	0.0405188	0.287058	0.0405137
				0.288562	0.0407414			0.288326	0.0407011	0.287523	0.0406364	0.287355	0.0406103	0.28749	0.0405906	0.287163	0.0405522	0.286024	0.0405081	0.287208	0.0405256	0.287159	0.0405205
				0.288684	0.0407569			0.288417	0.0407011	0.287618	0.0406357	0.28748	0.0406103	0.287607	0.0405976	0.287263	0.0405594	0.286206	0.0405055	0.287306	0.0405328	0.287257	0.0405276
				0.288806	0.0407724			0.288523	0.0407022	0.287728	0.040636	0.287624	0.0406114	0.287717	0.0406049	0.287356	0.0405666	0.286418	0.0405042	0.287398	0.0405399	0.287349	0.0405347
				0.288928	0.0407879			0.288641	0.0407043	0.287851	0.0406373	0.287786	0.0406134	0.287815	0.0406122	0.287438	0.0405736	0.286654	0.0405044	0.287479	0.0405468	0.28743	0.0405415
				0.28905	0.0408034			0.288768	0.0407073	0.287984	0.0406396	0.287959	0.0406164	0.287895	0.0406191	0.287506	0.0405801	0.286909	0.0405058	0.287546	0.0405531	0.287497	0.0405477
				0.289172	0.040819			0.288901	0.0407112	0.288121	0.0406429	0.28814	0.0406203	0.287955	0.0406254	0.287556	0.0405857	0.287174	0.0405087	0.287596	0.0405584	0.287547	0.0405531
				0.289294	0.0408345			0.289035	0.0407157	0.288261	0.040647	0.288323	0.040625	0.287992	0.0406308	0.287588	0.0405901	0.287442	0.0405127	0.287627	0.0405627	0.287578	0.0405574
				0.289416	0.04085			0.289167	0.0407209	0.288399	0.0406519	0.288504	0.0406303	0.288005	0.040635	0.287598	0.0405933	0.287708	0.0405179	0.287638	0.0405656	0.287588	0.0405604
				0.289416	0.04085			0.289294	0.0407266	0.288531	0.0406573	0.288677	0.0406361	Black	Black	Black	Black	0.287962	0.0405241	Black	Black	Black	Black
				IsoLine	IsoLine			0.289412	0.0407326	0.288654	0.0406632	0.288839	0.0406422					0.288198	0.0405311
								0.289518	0.0407387	0.288764	0.0406695	0.288983	0.0406485					0.28841	0.0405388
								0.289609	0.0407448	0.288859	0.0406758	0.289107	0.0406548					0.288592	0.0405468
								0.289682	0.0407508	0.288935	0.0406821	0.289207	0.040661					0.288739	0.0405551
								0.289736	0.0407564	0.288991	0.0406881	0.289281	0.0406668					0.288847	0.0405634
								0.289769	0.0407615	0.289025	0.0406938	0.289326	0.0406721					0.288913	0.0405714
								0.28978	0.0407659	0.289037	0.040699	0.289341	0.0406767					0.288935	0.040579
								Black	Black	Black	Black	Black	Black					Black	Black

## Sheet: PlotDat9
Source sheet	U-Pb Data Table	0.29	0.0409909	0.287844	0.04065	0.28802	0.0406725	0.290811	0.0410035	0.290922	0.0409336	0.291354	0.0409143	0.289885	0.0408276	0.289576	0.0408192	0.2893	0.0408079	0.289425	0.0407792	0.28978	0.0407788	0.289034	0.0407645	0.289147	0.0407609
Plot name	Concordia9	0.290153	0.0409213	0.287844	0.04065	0.288274	0.0407048	0.290793	0.0410072	0.290905	0.0409379	0.291344	0.0409181	0.289876	0.0408309	0.289569	0.0408219	0.28928	0.0408117	0.289412	0.0407829	0.289772	0.0407811	0.289028	0.0407669	0.28914	0.0407639
Plot Type	1	0.290603	0.0408998	0.287966	0.0406655	0.288528	0.0407371	0.29074	0.0410101	0.290855	0.0409415	0.291314	0.0409214	0.289849	0.0408334	0.289546	0.0408239	0.289222	0.0408148	0.289374	0.040786	0.289749	0.0407828	0.289009	0.0407687	0.289121	0.0407662
1st free col	29	0.289477	0.0408122	0.288088	0.040681	0.288782	0.0407694	0.290656	0.0410121	0.290775	0.0409442	0.291264	0.0409241	0.289807	0.0408349	0.28951	0.0408253	0.289127	0.040817	0.289313	0.0407883	0.289712	0.0407839	0.28898	0.0407697	0.28909	0.0407679
Sigma Level	2	0.289231	0.0408092	0.288209	0.0406965	0.289036	0.0408016	0.290542	0.0410133	0.290667	0.0409459	0.291196	0.0409262	0.28975	0.0408354	0.289462	0.040826	0.289001	0.0408182	0.289232	0.0407898	0.289663	0.0407844	0.28894	0.04077	0.289048	0.0407689
Absolute Errs	FALSE	0.288397	0.0407949	0.288331	0.0407121	0.28929	0.0408339	0.290405	0.0410134	0.290537	0.0409465	0.291112	0.0409275	0.289681	0.040835	0.289403	0.040826	0.288848	0.0408184	0.289133	0.0407904	0.289604	0.0407842	0.288892	0.0407695	0.288998	0.040769
Symbol Type	1	0.288842	0.0407692	0.288453	0.0407276	0.289543	0.0408662	0.290251	0.0410126	0.29039	0.040946	0.291014	0.0409281	0.289603	0.0408335	0.289337	0.0408253	0.288676	0.0408176	0.289022	0.0407901	0.289537	0.0407834	0.288838	0.0407683	0.288942	0.0407684
Inverse Plot	FALSE	0.289429	0.0407692	0.288575	0.0407431	0.289798	0.0408985	0.290085	0.0410108	0.290233	0.0409445	0.290904	0.0409279	0.289519	0.0408311	0.289267	0.0408238	0.288491	0.0408158	0.288903	0.0407889	0.289465	0.0407819	0.288781	0.0407665	0.288881	0.040767
Color Plot	FALSE	0.288752	0.0407526	0.288697	0.0407586	0.290052	0.0409308	0.289915	0.0410082	0.290072	0.0409419	0.290787	0.040927	0.289434	0.0408279	0.289194	0.0408217	0.288302	0.0408131	0.288781	0.0407868	0.289392	0.0407799	0.288722	0.040764	0.288819	0.040765
3D plot	FALSE	0.28885	0.040751	0.288819	0.0407741	0.290306	0.0409631	0.28975	0.0410048	0.289915	0.0409384	0.290664	0.0409253	0.289351	0.040824	0.289124	0.040819	0.288117	0.0408096	0.288662	0.0407839	0.28932	0.0407774	0.288664	0.040761	0.288758	0.0407623
Linear	FALSE	IsoLine	IsoLine	0.288941	0.0407896	0.29056	0.0409954	0.289595	0.0410008	0.289768	0.0409342	0.29054	0.0409229	0.289273	0.0408195	0.289058	0.0408159	0.287945	0.0408054	0.28855	0.0407804	0.289253	0.0407746	0.28861	0.0407576	0.288702	0.0407591
Data Range	N74:R83			0.289063	0.0408052	0.290814	0.0410277	0.289458	0.0409963	0.289637	0.0409294	0.290418	0.0409199	0.289204	0.0408148	0.288999	0.0408126	0.287792	0.0408008	0.288452	0.0407764	0.289194	0.0407715	0.288562	0.040754	0.288651	0.0407556
Filled Symbols	FALSE			0.289185	0.0408207	0.291068	0.04106	0.289345	0.0409916	0.28953	0.0409242	0.290301	0.0409164	0.289147	0.0408099	0.288951	0.040809	0.287666	0.0407959	0.28837	0.0407721	0.289144	0.0407683	0.288523	0.0407504	0.28861	0.0407518
ConcAge	FALSE			0.289307	0.0408362	0.291323	0.0410923	0.28926	0.0409869	0.28945	0.040919	0.290191	0.0409124	0.289105	0.0408052	0.288915	0.0408055	0.287571	0.040791	0.28831	0.0407677	0.289108	0.0407652	0.288493	0.0407469	0.288579	0.0407481
ConcSwap	FALSE			0.289429	0.0408517	IsoLine	IsoLine	0.289208	0.0409824	0.2894	0.0409138	0.290094	0.040908	0.289079	0.0408007	0.288893	0.0408022	0.287513	0.0407862	0.288272	0.0407633	0.289085	0.0407622	0.288475	0.0407436	0.28856	0.0407444
1st Symbol-row	1			0.289551	0.0408672			0.28919	0.0409782	0.289383	0.0409089	0.29001	0.0409034	0.28907	0.0407968	0.288885	0.0407991	0.287493	0.0407819	0.288259	0.0407592	0.289078	0.0407596	0.288469	0.0407407	0.288554	0.0407411
				0.289673	0.0408827			0.289208	0.0409746	0.2894	0.0409046	0.289942	0.0408988	0.289079	0.0407935	0.288893	0.0407965	0.287513	0.040778	0.288272	0.0407556	0.289085	0.0407573	0.288475	0.0407383	0.28856	0.0407382
				0.289795	0.0408983			0.28926	0.0409717	0.28945	0.0409011	0.289892	0.0408941	0.289105	0.040791	0.288915	0.0407944	0.287572	0.040775	0.28831	0.0407525	0.289108	0.0407556	0.288494	0.0407366	0.288579	0.0407358
				0.289917	0.0409138			0.289345	0.0409696	0.28953	0.0408984	0.289862	0.0408896	0.289148	0.0407895	0.288951	0.040793	0.287666	0.0407728	0.288371	0.0407502	0.289145	0.0407545	0.288523	0.0407355	0.288611	0.0407341
				0.29004	0.0409293			0.289458	0.0409685	0.289638	0.0408967	0.289851	0.0408854	0.289205	0.0407889	0.289	0.0407923	0.287792	0.0407715	0.288452	0.0407487	0.289194	0.040754	0.288563	0.0407352	0.288652	0.0407332
				0.290162	0.0409448			0.289596	0.0409683	0.289768	0.040896	0.289862	0.0408816	0.289274	0.0407894	0.289058	0.0407923	0.287945	0.0407713	0.288551	0.040748	0.289253	0.0407542	0.288611	0.0407357	0.288702	0.040733
				0.290284	0.0409603			0.28975	0.0409691	0.289915	0.0408965	0.289892	0.0408783	0.289352	0.0407909	0.289124	0.0407931	0.288118	0.0407721	0.288662	0.0407484	0.28932	0.040755	0.288665	0.0407369	0.288759	0.0407336
				0.290406	0.0409758			0.289916	0.0409709	0.290073	0.0408981	0.289942	0.0408756	0.289435	0.0407933	0.289195	0.0407946	0.288303	0.0407739	0.288782	0.0407496	0.289392	0.0407565	0.288723	0.0407388	0.28882	0.040735
				0.290528	0.0409914			0.290085	0.0409736	0.290233	0.0409007	0.29001	0.0408735	0.289521	0.0407965	0.289267	0.0407967	0.288491	0.0407766	0.288903	0.0407517	0.289466	0.0407585	0.288782	0.0407413	0.288882	0.0407371
				0.29065	0.0410069			0.290251	0.040977	0.290391	0.0409042	0.290094	0.0408722	0.289604	0.0408004	0.289338	0.0407993	0.288676	0.0407802	0.289022	0.0407545	0.289537	0.040761	0.288839	0.0407442	0.288943	0.0407397
				0.290772	0.0410224			0.290406	0.040981	0.290538	0.0409084	0.290192	0.0408716	0.289682	0.0408048	0.289404	0.0408024	0.288849	0.0407843	0.289134	0.040758	0.289604	0.0407638	0.288893	0.0407476	0.288999	0.0407429
				0.290895	0.0410379			0.290543	0.0409854	0.290668	0.0409132	0.290301	0.0408717	0.289751	0.0408096	0.289462	0.0408058	0.289001	0.0407889	0.289232	0.040762	0.289664	0.0407669	0.288941	0.0407512	0.289049	0.0407465
				0.291017	0.0410534			0.290656	0.0409901	0.290775	0.0409183	0.290419	0.0408727	0.289807	0.0408144	0.289511	0.0408093	0.289128	0.0407938	0.289314	0.0407663	0.289713	0.0407701	0.28898	0.0407548	0.289091	0.0407502
				0.291139	0.041069			0.290741	0.0409948	0.290856	0.0409236	0.290541	0.0408744	0.28985	0.0408192	0.289547	0.0408128	0.289222	0.0407987	0.289375	0.0407708	0.289749	0.0407732	0.28901	0.0407584	0.289122	0.040754
				0.291261	0.0410845			0.290793	0.0409994	0.290905	0.0409288	0.290665	0.0408768	0.289876	0.0408237	0.289569	0.0408162	0.28928	0.0408035	0.289412	0.0407751	0.289772	0.0407762	0.289028	0.0407616	0.289141	0.0407576
				0.291383	0.0411			0.290811	0.0410035	0.290922	0.0409336	0.290788	0.0408798	0.289885	0.0408276	0.289576	0.0408192	0.2893	0.0408079	0.289425	0.0407792	0.28978	0.0407788	0.289034	0.0407645	0.289147	0.0407609
				0.291383	0.0411			Black	Black	Black	Black	0.290905	0.0408833	Black	Black	Black	Black	Black	Black	Black	Black	Black	Black	Black	Black	Black	Black
				IsoLine	IsoLine							0.291014	0.0408873
												0.291112	0.0408917
												0.291196	0.0408963
												0.291264	0.0409009
												0.291314	0.0409056
												0.291344	0.0409101
												0.291354	0.0409143
												Black	Black

## Sheet: U-Pb Data Table
Table S2. CA-TIMS zircon U-Pb isotopic data.
										Radiogenic Isotope Ratios									Isotopic Dates
			Th	206Pb*	mol %	Pb*	Pbc	206Pb		208Pb	207Pb		207Pb		206Pb		corr.		207Pb		207Pb		206Pb			include in
Sample	Tracer	LA-ICPMS	U	x10-13 mol	206Pb*	Pbc	(pg)	204Pb		206Pb	206Pb	% err	235U	% err	238U	% err	coef.		206Pb	±	235U	±	238U	±		weighted mean?
(a)	solution	spot label	(b)	(c)	(c)	(c)	(c)	(d)		(e)	(e)	(f)	(e)	(f)	(e)	(f)			(g)	(f)	(g)	(f)	(g)	(f)			Weighted Mean Calculations
1683223
z4	ET535		0.666768	0.583614	0.989339	29.1375	0.521872	1693.4		0.211414	0.0512199	0.23755	0.282774	0.285369	0.0400586	0.0718048	0.736652		249.704	5.46612	252.856	0.638745	253.196	0.178283		x	206Pb/238U ± random (+tracer) [+decay constant]				MSWD =	0.625948
z1	ET535		0.624671	2.15786	0.99707	105.701	0.526263	6161.38		0.198066	0.0512762	0.0945804	0.283045	0.148289	0.0400529	0.0640242	0.903705		252.232	2.17534	253.07	0.332164	253.161	0.158943		x	253.1	± 0.07 (0.14) [0.30]			pof =	0.679992
z3	ET535		0.626323	0.365261	0.989292	28.7116	0.328113	1684.96		0.198591	0.0513836	0.277306	0.283543	0.322808	0.0400395	0.077958	0.663758		257.042	6.37249	253.464	0.724073	253.078	0.193472		x					n =	6
z2	ET535		0.714049	0.430745	0.98616	22.6407	0.501688	1303.74		0.226407	0.0513592	0.342468	0.283403	0.390557	0.0400387	0.0808587	0.662098		255.951	7.87145	253.353	0.875701	253.073	0.200667		x
z5	ET535		0.668181	0.446621	0.989333	29.127	0.399658	1691.38		0.211863	0.0512247	0.274046	0.282625	0.319123	0.0400336	0.0753826	0.674391		249.918	6.30567	252.737	0.714	253.041	0.187054		x
z6	ET535		0.604144	0.487461	0.989103	28.0482	0.445701	1655.73		0.191559	0.0513852	0.261371	0.28348	0.30486	0.0400294	0.0736884	0.669493		257.114	6.00623	253.414	0.683697	253.015	0.182831		x
1683222
z2	ET535		0.676514	0.248464	0.98126	16.4778	0.393827	962.74		0.214499	0.0511718	0.480872	0.283007	0.533649	0.0401292	0.0871787	0.657544		247.543	11.0694	253.04	1.19524	253.633	0.216821		x	206Pb/238U ± random (+tracer) [+decay constant]				MSWD =	1.25469
z5	ET535		0.754192	0.385878	0.986743	23.882	0.430281	1360.91		0.239129	0.0511652	0.343621	0.282834	0.388537	0.0401099	0.07837	0.641339		247.243	7.91039	252.903	0.86981	253.514	0.194823		x	253.462	± 0.09 (0.16) [0.31]			pof =	0.285377
z6	ET535		0.635288	0.535869	0.99294	43.8008	0.316234	2555.42		0.20143	0.0512717	0.205573	0.283299	0.249848	0.0400924	0.0760542	0.683222		252.032	4.72834	253.271	0.560045	253.406	0.188987		x					n =	5
z1	ET535		0.784692	0.604926	0.988445	27.6722	0.586597	1564.88		0.248801	0.0512606	0.254667	0.283224	0.299974	0.0400904	0.0721796	0.701242		251.531	5.85806	253.212	0.672266	253.393	0.17935		x
z3	ET535		1.09448	0.105568	0.963065	9.07306	0.336013	488.488		0.347029	0.051387	1.00456	0.28372	1.08935	0.0400618	0.174631	0.54679		257.192	23.0841	253.604	2.44466	253.216	0.433622		x
2105111
z2	ET535		0.565255	0.387976	0.991679	36.4536	0.270173	2168.33		0.179221	0.0512114	0.198727	0.283417	0.247836	0.0401562	0.0707793	0.768572		249.321	4.57312	253.364	0.555714	253.801	0.176148			206Pb/238U ± random (+tracer) [+decay constant]				MSWD =	1.48503
z3	ET535		0.491786	0.649002	0.994075	50.3412	0.321048	3045.03		0.155928	0.0513133	0.16184	0.283844	0.208552	0.0401368	0.068255	0.772062		253.899	3.72119	253.702	0.468178	253.681	0.169787		x	253.592	± 0.08 (0.15) [0.31]			pof =	0.203666
z1	ET535		0.705584	0.565098	0.992403	41.4138	0.359023	2374.92		0.223716	0.0512506	0.203284	0.283443	0.248197	0.0401292	0.0692651	0.729974		251.084	4.67648	253.385	0.556565	253.634	0.172269		x					n =	5
z4	ET535		0.633434	0.929161	0.996328	84.4751	0.28418	4913.94		0.20084	0.0512868	0.118412	0.283635	0.169149	0.0401281	0.0660217	0.849168		252.704	2.72324	253.537	0.379505	253.627	0.164198		x
z6	ET535		0.512974	1.67548	0.997704	131.103	0.32003	7857.41		0.162646	0.0512762	0.0872089	0.28355	0.144478	0.0401243	0.0682906	0.909424		252.232	2.0058	253.47	0.324078	253.603	0.169825		x
z5	ET535		0.718693	0.521375	0.994047	53.1145	0.259143	3030.67		0.227875	0.0513513	0.165772	0.283749	0.213447	0.0400938	0.0681176	0.782032		255.594	3.81042	253.627	0.479043	253.414	0.169271		x
2120076
z1	ET535		1.06909	1.1729	0.995986	85.8354	0.39228	4495.18		0.338953	0.051241	0.12307	0.284533	0.172372	0.0402911	0.0661526	0.83133		250.651	2.83142	254.247	0.38769	254.637	0.165166		x	206Pb/238U ± random (+tracer) [+decay constant]				MSWD =	0.338008
z4	ET535		0.634265	1.09922	0.995775	73.3797	0.387115	4269.89		0.201092	0.0513247	0.118164	0.28498	0.169119	0.0402886	0.0661702	0.850452		254.403	2.7167	254.6	0.380838	254.622	0.1652		x	254.576	± 0.07 (0.14) [0.31]			pof =	0.890152
z6	ET535		0.628874	1.73028	0.996927	100.858	0.442713	5870.36		0.199383	0.0512719	0.107969	0.284644	0.158424	0.0402825	0.065907	0.852391		252.039	2.48336	254.335	0.356427	254.584	0.164518		x					n =	6
z5	ET535		0.628716	0.461259	0.990543	32.5652	0.365493	1907.77		0.199334	0.0512404	0.25208	0.284421	0.297651	0.0402757	0.079654	0.66254		250.623	5.79951	254.158	0.669255	254.542	0.198802		x
z2	ET535		0.611255	1.73334	0.996834	97.4602	0.456896	5698.74		0.193798	0.0512818	0.0978516	0.284633	0.152021	0.0402732	0.0649185	0.900102		252.482	2.25048	254.326	0.34201	254.526	0.162015		x
z3	ET535		0.670976	0.591684	0.991041	34.7676	0.443913	2013.88		0.212732	0.0513281	0.247114	0.284884	0.290233	0.0402723	0.0772436	0.650258		254.56	5.68123	254.524	0.653402	254.521	0.19277		x
2120074
z3	ET535		0.531427	1.72209	0.99365	47.5234	0.911931	2860.56		0.168482	0.0513446	0.140636	0.28573	0.189381	0.040379	0.0714321	0.783726		255.297	3.23283	255.193	0.427338	255.182	0.178721			206Pb/238U ± random (+tracer) [+decay constant]				MSWD =	1.32539
z1	ET535		0.590473	0.176396	0.971628	10.5436	0.427483	635.924		0.187202	0.0512302	0.740404	0.285083	0.804691	0.0403775	0.108261	0.637574		250.168	17.0356	254.682	1.81259	255.172	0.270855			254.699	± 0.11 (0.16) [0.32]			pof =	0.26405
z6	ET535		0.687969	0.137592	0.962417	8.08251	0.44593	480.061		0.218115	0.0512662	0.945219	0.285072	1.02444	0.0403476	0.142616	0.603659		251.781	21.7418	254.673	2.30751	254.987	0.356554		x					n =	4
z5	ET535		0.760033	0.56802	0.989994	31.7948	0.476466	1803.16		0.240965	0.0512475	0.248796	0.284684	0.292881	0.0403073	0.0713098	0.694051		250.944	5.72362	254.366	0.659003	254.738	0.178111		x
z2	ET535		0.597176	0.272884	0.981288	16.1747	0.431874	964.181		0.189333	0.0513657	0.586173	0.285254	0.639479	0.0402952	0.0958044	0.608408		256.241	13.4722	254.817	1.44112	254.662	0.239221		x
z4	ET535		0.56257	1.1837	0.991737	36.7374	0.817446	2196.13		0.178362	0.0513067	0.152368	0.284861	0.20235	0.0402858	0.0727715	0.78238		253.598	3.5036	254.506	0.455522	254.605	0.181668		x
2120077
z1	ET535		0.508153	1.11206	0.995752	70.6319	0.393773	4246.84		0.161097	0.0513125	0.12293	0.286441	0.172846	0.0405048	0.0668113	0.833226		253.859	2.82656	255.754	0.390782	255.961	0.16766			206Pb/238U ± random (+tracer) [+decay constant]				MSWD =	1.41656
z5	ET535		0.545181	2.92078	0.997881	143.312	0.514683	8518.38		0.172839	0.0512652	0.080741	0.285778	0.137801	0.0404484	0.0644027	0.937062		251.735	1.85721	255.231	0.310989	255.612	0.1614		x	255.482	± 0.07 (0.15) [0.31]			pof =	0.2255
z6	ET535		0.457634	3.787	0.998545	204.091	0.45789	12402.3		0.145084	0.0512903	0.0731688	0.28582	0.132154	0.0404344	0.0646925	0.953875		252.865	1.68269	255.264	0.29828	255.525	0.162072		x					n =	5
z3	ET535		0.475118	1.24666	0.995575	67.2129	0.459852	4077.48		0.150628	0.0513137	0.120446	0.285898	0.17112	0.040427	0.0658836	0.848535		253.913	2.76942	255.326	0.386309	255.479	0.165027		x
z2	ET535		0.635624	0.671977	0.992632	41.9644	0.413972	2448.67		0.201514	0.0513757	0.189317	0.286175	0.235238	0.0404173	0.0697025	0.743312		256.692	4.35078	255.544	0.531457	255.419	0.174553		x
z4	ET535		0.598238	1.5051	0.996891	98.9232	0.389565	5803.27		0.189662	0.0513056	0.102998	0.28571	0.156406	0.0404068	0.0677316	0.871102		253.552	2.36839	255.177	0.352911	255.354	0.169574		x
19KP02
z7	ET2535		0.704557	0.585272	0.99734	118.858	0.129542	6783.27		0.223357	0.0514316	0.0996796	0.287544	0.114692	0.0405665	0.0333819	0.567887		259.188	2.28975	256.624	0.260079	256.344	0.0838933			206Pb/238U ± random (+tracer) [+decay constant]				MSWD =	1.97973
z5	ET2535		0.612035	1.35053	0.998805	258.765	0.134116	15096.6		0.194027	0.0513952	0.0226871	0.28718	0.0496117	0.0405438	0.0302119	0.957076		257.564	0.5213	256.337	0.11239	256.203	0.0758859			256.043	± 0.04 (0.13) [0.30]			pof =	0.0945931
z6	ET2535		0.679096	3.11626	0.999196	391.574	0.208031	22448.6		0.215288	0.0514472	0.0298183	0.287361	0.0510342	0.0405284	0.0304149	0.852901		259.885	0.684873	256.48	0.11567	256.108	0.0763677		x					n =	5
z4b	ET2535		0.628889	1.39883	0.998562	216.011	0.167139	12550.1		0.199372	0.0514934	0.0456868	0.287574	0.0631516	0.0405221	0.0293895	0.747546		261.949	1.04895	256.648	0.143216	256.068	0.0737821		x
z2	ET2535		0.549619	0.930991	0.997761	135.788	0.17337	8058.97		0.174242	0.0514512	0.064779	0.287322	0.080435	0.0405199	0.0300705	0.659571		260.064	1.48781	256.45	0.182288	256.055	0.0754877		x
z4a	ET2535		0.634994	1.85694	0.998364	190.07	0.252547	11028.2		0.201308	0.0514673	0.0509184	0.287353	0.0674249	0.0405116	0.0317588	0.693503		260.783	1.16931	256.474	0.152816	256.003	0.0797102		x
z1	ET2535		0.663365	1.23021	0.998533	213.495	0.150023	12296.9		0.210303	0.0513982	0.0558784	0.286926	0.0711877	0.0405057	0.032462	0.650456		257.697	1.28393	256.137	0.161158	255.967	0.081464		x
PB-19-WVG-01B
z5	BSU1B	96	0.744757	0.388472	0.99534	68.3844	0.150955	3871.48		0.236087	0.0514684	0.181304	0.288967	0.229835	0.0407382	0.0746655	0.744301		260.829	4.16351	257.746	0.523182	257.407	0.188408			206Pb/238U ± random (+tracer) [+decay constant]				MSWD =	1.1627
z7	BSU1B	97	0.610251	0.583831	0.995311	65.6915	0.228277	3847.7		0.193453	0.0514111	0.198718	0.288191	0.239905	0.040674	0.0771058	0.649371		258.272	4.56553	257.134	0.544965	257.009	0.194271			256.193	± 0.09 (0.16) [0.31]			pof =	0.322309
z1	BSU1B	82	0.735328	0.20641	0.991865	38.9469	0.140501	2217.85		0.233105	0.0514506	0.263285	0.288231	0.314684	0.0406485	0.0770236	0.735744		260.035	6.04703	257.166	0.714909	256.851	0.193947							n =	4
z2	BSU1B	103	0.64364	0.930529	0.997295	115.086	0.209451	6670.49		0.204043	0.0513632	0.107811	0.287429	0.163773	0.0406043	0.0705966	0.873413		256.127	2.47791	256.533	0.37126	256.578	0.177578
z6	BSU1B	86	0.69881	2.1999	0.998636	231.655	0.249456	13223.2		0.221536	0.0513618	0.0765631	0.287112	0.138513	0.0405606	0.0701816	0.939268		256.069	1.75973	256.283	0.313729	256.307	0.176351		x
z4	BSU1B	80	0.620137	0.276177	0.992991	43.9567	0.161788	2574.12		0.196595	0.0514047	0.4227	0.287307	0.462818	0.0405544	0.101299	0.488449		257.986	9.71199	256.438	1.04883	256.268	0.254505		x
z8	BSU1B	100	0.660013	1.64104	0.999073	337.952	0.126316	19471.3		0.209238	0.051405	0.0742469	0.287157	0.136858	0.0405329	0.0694623	0.949609		258	1.7059	256.319	0.310019	256.135	0.174429		x
z3	BSU1B	78	0.741493	1.98747	0.99883	273.049	0.193257	15417.3		0.23507	0.0514024	0.0750171	0.287108	0.136677	0.040528	0.0688331	0.946201		257.882	1.72363	256.28	0.309568	256.105	0.172829		x
19GI05
z4b	ET2535		0.676758	0.355912	0.991397	36.27	0.256328	2097.17		0.214513	0.0513341	0.206504	0.29	0.228284	0.0409909	0.045101	0.560056		254.825	4.74736	258.56	0.521091	258.972	0.114484			206Pb/238U ± random (+tracer) [+decay constant]				MSWD =	1.95575
z6	ET2535		0.594635	0.469419	0.992389	40.192	0.298791	2370.53		0.188487	0.0514483	0.19709	0.290153	0.216693	0.0409213	0.0504012	0.488417		259.935	4.52677	258.68	0.494835	258.541	0.127729			257.546	± 0.05 (0.13) [0.3]			pof =	0.118251
z1	ET2535		0.618047	0.463042	0.9924	40.4993	0.294286	2374.09		0.19591	0.0515552	0.188949	0.290603	0.211307	0.0408998	0.0565503	0.508823		264.699	4.33606	259.034	0.483116	258.408	0.14324							n =	4
z2	ET2535		0.609507	0.496382	0.996822	97.0554	0.131345	5677.01		0.193208	0.0514658	0.091187	0.289477	0.115022	0.0408122	0.0465507	0.662257		260.715	2.09409	258.148	0.262186	257.865	0.117669
z4a	ET2535		0.59122	0.726922	0.997201	109.727	0.169329	6446.26		0.187412	0.0514258	0.0822515	0.289231	0.0976391	0.0408092	0.0339388	0.59322		258.927	1.8895	257.954	0.222417	257.847	0.085783
z10	ET2535	153	0.48417	0.502419	0.990481	31.157	0.400741	1895.36		0.153479	0.0512954	0.233292	0.288397	0.255906	0.0407949	0.0472522	0.551051		253.094	5.36487	257.297	0.581636	257.758	0.119393
z7	ET2535		0.636344	0.402069	0.995756	73.1042	0.142213	4251.52		0.201719	0.051407	0.149643	0.288842	0.164847	0.0407692	0.0424797	0.471203		258.086	3.43815	257.648	0.375122	257.599	0.10727		x
z8	ET2535	141	0.608378	0.931583	0.996399	85.6112	0.279382	5010.99		0.192853	0.0515114	0.0833366	0.289429	0.0990843	0.0407692	0.0304687	0.632445		262.75	1.91311	258.11	0.225829	257.599	0.0769397		x
z5	ET2535		0.759712	1.03221	0.997864	150.124	0.183378	8446.61		0.240827	0.0514118	0.0616336	0.288752	0.0799281	0.0407526	0.0348962	0.68423		258.304	1.41602	257.576	0.181838	257.496	0.0880854		x
z9	ET2535	140	0.584088	1.58633	0.99868	232.551	0.174035	13666.7		0.185155	0.0514314	0.0708742	0.28885	0.0839296	0.040751	0.0361911	0.549024		259.181	1.62806	257.654	0.190992	257.486	0.0913507		x
(a) z1, z2, etc. are labels for analyses composed of single zircon grains that were annealed and chemically abraded (Mattinson, 2005). z4a and z4b are fragments from the same grain.
(b) Model Th/U ratio calculated from radiogenic 208Pb/206Pb ratio and 207Pb/235U date.
(c) Pb* and Pbc are radiogenic and common Pb, respectively. mol % 206Pb* is with respect to radiogenic and blank Pb.
(d) Measured ratio corrected for spike and fractionation only. Fractionation correction for analyses done with tracer solutions ET535 or BSU1B is 0.18 ± 0.03 (1 sigma) %/amu (atomic mass unit) for single-collector Daly analyses,
based on analysis of EARTHTIME 202Pb-205Pb ET2535 tracer solution. Fractionation correction for analyses done with tracer solution ET2535 is based on measurement of 202Pb/205Pb in the tracer solution.
(e) Corrected for fractionation and spike. Common Pb in zircon analyses is assigned to procedural blank with composition of 206Pb/204Pb = 18.04 ± 0.61%; 207Pb/204Pb = 15.54 ± 0.52%; 208Pb/204Pb = 37.69 ± 0.63% (1 sigma).
206Pb/238U and 207Pb/206Pb ratios corrected for initial disequilibrium in 230Th/238U using a D(Th/U) of 0.20 ± 0.05 (1 sigma).
(f) Errors are 2 sigma, propagated using algorithms of Schmitz and Schoene (2007) and Crowley et al. (2007).
(g) Calculations based on the decay constants of Jaffey et al. (1971). 206Pb/238U and 207Pb/206Pb dates corrected for initial disequilibrium in 230Th/238U using a D(Th/U) of 0.20 ± 0.05 (1 sigma).
